# Supplementary material for: Synthesis and optical properties of mono- and diaminocorannulenes
Source: Royal Society of Chemistry journal article supplement (doi:10.1039/d0cc03853a), 2020-01-01

**Supporting Information for:**

**Synthesis and Optical Properties of Mono- and Diaminocorannulenes**

Feifei Xie, Nathaniel S. Finney\*

School of Pharmaceutical Sciences and Technology, Health Sciences Platform,

Tianjin University, 92 Weijin Road, Nankai District, Tianjin, 300072, China.

Email: nfinney@tju.edu.cn

Page S1 1. Materials and instrumentations.

Page S1 2. Synthetic procedure and tabulated spectroscopic data.

Page S9 3. Optical data and spectra.

Page S13 4. References.

Page S14 5.  $^1\text{H}$  NMR and  $^{13}\text{C}$  NMR spectra.

## 1. Materials and instrumentation.

All commercial reagents were used without further purification. Solvents were purified using standard procedures. All reactions involving anhydrous and inert conditions were carried under an argon atmosphere, and the glassware was performed using the oven (130 °C) dried. Anhydrous solvents were obtained by filtration of reagent-grade solvent through an Innovative Technologies solvent drying system.

Column chromatographic purification was carried out on Merck silica gel 60 (particle size 0.040 – 0.063 mm). Reactions were monitored by thin layer chromatography (TLC) and visualized by ultraviolet (UV) light ( $\lambda = 254$  nm and  $\lambda = 365$  nm). Analytical TLC was performed with Merck TLC silica gel 60 F254.

$^1\text{H}$  NMR and  $^{13}\text{C}$  NMR spectra were recorded with a Bruker Ascend III 400 and Avance III 600 instruments at 298.6 K.  $^1\text{H}$  NMR chemical shifts were recorded in parts per million (ppm) relative to  $\text{CDCl}_3$  ( $\delta = 7.26$  ppm) and  $\text{CD}_3\text{OD}$  ( $\delta = 3.31$  ppm). Multiplicities are given as s (singlet), d (doublet), t (triplet), q (quartet), dd (doublet of doublets), m (multiplet).  $^{13}\text{C}$  NMR chemical shifts were recorded in parts per million (ppm) relative to  $\text{CDCl}_3$  ( $\delta = 77.00$  ppm),  $\text{CD}_3\text{OD}$  ( $\delta = 48.8$  ppm), and  $\text{DMSO-d}_6$  ( $\delta = 49.7$  ppm).

MS data were obtained with Agilent Technologies TOF (6230B) in  $\text{ESI}^+$  mode with TOF mass analyzer.

The UV absorption spectra were measured with Hitachi U-3900 spectrophotometer. Fluorescence measurements were carried out on Edinburgh FLS 980 and FLS 1000 spectrophotometer, using 450W Xenon lamp. Emission spectra were obtained by exciting at the longest wavelength excitation maximum. Absolute quantum yields were measured by using an integrating sphere detector from Edinburgh Instruments.

Abbreviations :

RT: Room Temperature

BINAP: ( $\pm$ )-2,2'-Bis(diphenylphosphino)-1,1'-binaphthyl

$\text{Pd}(\text{dba})_2$ : Bis(dibenzylidene-acetone) palladium

DCM: Dichloromethane

MeOH: Methanol

EtOAc: Ethylacetate

TEA: Triethylamine

THF: Tetrahydrofuran

DMF: *N,N*-Dimethylformamide

## 2. Synthetic procedures.

**4a:**

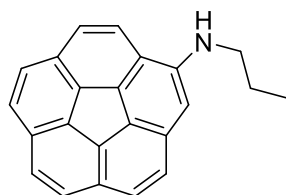

To a solution of monobromocorannulene (20 mg, 0.06 mmol) and  $\text{KO}^t\text{Bu}$  (14 mg, 0.12 mmol) in toluene (5 mL), under an argon atmosphere, propylamine (0.5 mL) was added, and the mixture was degassed three times by evacuating the flask and backfilling with Ar.  $\text{Pd}(\text{OAc})_2$  (1.2 mg, 0.006 mmol) and BINAP (3 mg, 0.006 mmol)

were added, and the mixture was heated to 50 °C. After 2 hours, the mixture was heated to 80 °C. After 10 hours, the reaction mixture was allowed to cool to RT, diluted with EtOAc (10 mL), and filtered through celite. The filtrate was washed with saturated aqueous NH<sub>4</sub>Cl (30 mL), and the aqueous phase was extracted with EtOAc (3 x 20 mL). The combined organic phase was washed with saturated aqueous NaCl (30 mL). The organic phase was dried over anhydrous Na<sub>2</sub>SO<sub>4</sub> and concentrated under reduced pressure. The residue was purified by column chromatography (eluent: petroleum ether to petroleum ether : EtOAc = 60 : 1) to afford **4a** (2 mg, 0.007 mmol, 11%).

<sup>1</sup>H NMR (600 MHz, CDCl<sub>3</sub>) δ: 7.75-7.87 (m, 5H), 7.64-7.74 (m, 3H), 7.59 (d, *J* = 8.7 Hz, 1H), 3.37 (t, *J* = 7.2 Hz, 2H), 1.85-1.91 (m, 2H), 1.08 (t, *J* = 7.4 Hz, 3H).

<sup>13</sup>C NMR (150 MHz, CDCl<sub>3</sub>) δ: 136.0, 135.8, 135.7, 135.3, 134.9, 130.7, 130.3, 127.9, 127.5, 127.3, 127.2, 127.1, 126.9, 126.5, 126.4, 126.3, 125.0, 122.9, 122.1, 55.4, 21.6, 11.5.

MS-ESI: calculated for C<sub>23</sub>H<sub>17</sub>N [M+H]<sup>+</sup>: 308.1361; found: 308.1187.

#### 4b:

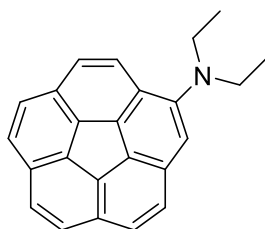

To a solution of monobromocorannulene (50 mg, 0.15 mmol) and KO<sup>t</sup>Bu (48 mg, 0.43 mmol) in toluene (5 mL), under an argon atmosphere, diethylamine (40 μL, 0.39 mmol) was added, and the mixture was degassed three times by evacuating the flask and backfilling with Ar. Pd(OAc)<sub>2</sub> (4 mg, 0.02 mmol) and BINAP (10 mg, 0.02 mmol) were added, and the mixture was heated to 55 °C. After 2 hours, the mixture was heated to 70 °C. After 10 hours, the reaction mixture was allowed to cool to RT, diluted with EtOAc (20 mL), and filtered through celite. The filtrate was washed with saturated aqueous NH<sub>4</sub>Cl (30 mL), and the aqueous phase was extracted with EtOAc (3 x 30 mL). The combined organic phase was washed with saturated aqueous NaCl (50 mL). The organic phase was dried over anhydrous Na<sub>2</sub>SO<sub>4</sub> and concentrated under reduced pressure. The residue was purified by column chromatography (eluent: petroleum ether to petroleum ether : EtOAc = 60 : 1) to afford **4b** (5 mg, 0.02 mmol, 11%).

<sup>1</sup>H NMR (600 MHz, CDCl<sub>3</sub>) δ: 7.89 (d, *J* = 8.7 Hz, 1H), 7.71-7.81 (m, 6H), 7.65 (d, *J* = 8.6 Hz, 1H), 6.85 (s, 1H), 3.70 (q, *J* = 6.9 Hz, 4H), 1.25 (t, *J* = 7.0 Hz, 6H).

<sup>13</sup>C NMR (150 MHz, CDCl<sub>3</sub>) δ: 150.6, 137.6, 136.3, 136.0, 135.8, 132.4, 131.4, 130.8, 130.8, 130.4, 129.2, 127.2, 127.2, 127.0, 126.6, 126.2, 125.7, 108.2, 47.3, 12.1.

MS-ESI: calculated for C<sub>24</sub>H<sub>19</sub>N [M+H]<sup>+</sup>: 322.1571; found: 322.1361.

#### 4c:

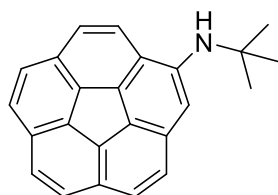

To a solution of monobromocorannulene (50 mg, 0.15 mmol) and KO<sup>t</sup>Bu (48 mg, 0.43 mmol) in toluene (5 mL), under an argon atmosphere, *tert*-Butylamine (3 mL) was added, and the mixture was degassed three times by evacuating the flask and backfilling with argon. Pd(OAc)<sub>2</sub> (4 mg, 0.02 mmol) and BINAP (10 mg, 0.02 mmol) were added, and the mixture was heated to 45 °C. After 2 hours, the mixture was heated to 60 °C. After 10 hours, the reaction mixture was allowed to cool to RT, diluted with EtOAc (30 mL), and filtered through celite. The filtrate was washed with saturated aqueous NH<sub>4</sub>Cl (30

mL), and the aqueous phase was extracted with EtOAc (3 x 30 mL). The combined organic phase was washed with saturated aqueous NaCl (50 mL). The organic phase was dried over anhydrous Na<sub>2</sub>SO<sub>4</sub> and concentrated under reduced pressure. The residue was purified by column chromatography (eluent: petroleum ether to petroleum ether : EtOAc = 60 : 1) to afford **4c** (5 mg, 0.02 mmol, 11%).

<sup>1</sup>H NMR (400 MHz, CDCl<sub>3</sub>) δ: 7.55-7.86 (m, 8H), 6.87 (s, 1H), 1.57 (s, 9H).

<sup>13</sup>C NMR (100 MHz, CDCl<sub>3</sub>) δ: 137.9, 135.8, 130.9, 130.3, 129.0, 128.2, 127.4, 127.3, 127.0, 126.6, 126.5, 125.3, 125.0, 122.6, 103.9, 29.5, 21.5.

MS-ESI: calculated for C<sub>24</sub>H<sub>19</sub>N [M+H]<sup>+</sup>: 322.1517; found: 322.1261.

#### 4d:

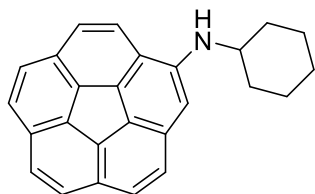

To a solution of monobromocorannulene (30 mg, 0.09 mmol) and KO<sup>t</sup>Bu (28 mg, 0.25 mmol) in toluene (5 mL), under an argon atmosphere, cyclohexylamine (2 mL) was added, and the mixture was degassed three times by evacuating the flask and backfilling with Ar. Pd(OAc)<sub>2</sub> (2 mg, 0.01 mmol) and BINAP (5 mg, 0.01 mmol) were added, and the mixture was heated to reflux. After 9 hours, the reaction mixture was allowed to cool to RT, diluted with EtOAc (20 mL), and filtered through celite. The filtrate was washed with saturated aqueous NH<sub>4</sub>Cl (30 mL), and the aqueous phase was extracted with EtOAc (3 x 30 mL). The combined organic phase was washed with saturated aqueous NaCl (50 mL). The organic phase was dried over anhydrous Na<sub>2</sub>SO<sub>4</sub> and concentrated under reduced pressure. The residue was purified by column chromatography (eluent: petroleum ether to petroleum ether : EtOAc = 60 : 1) to afford **4d** (12 mg, 0.04 mmol, 39%).

<sup>1</sup>H NMR (400 MHz, CDCl<sub>3</sub>) δ: 7.64 -7.90 (m, 7H), 7.60 (d, *J* = 8.6 Hz, 1H), 6.71 (s, 1H), 3.60 (s, 1H), 2.24 (d, *J* = 9.4 Hz, 2H), 1.82 (s, 2H), 1.70 (d, *J* = 12.0 Hz, 1H), 1.60-1.19 (m, 5H).

<sup>13</sup>C NMR (100 MHz, CDCl<sub>3</sub>) δ: 136.0, 135.8, 135.1, 130.9, 130.4, 127.4, 127.1, 126.5, 123.3, 122.4, 29.7, 25.8, 24.9.

MS-ESI: calculated for C<sub>26</sub>H<sub>21</sub>N [M+Na]<sup>+</sup>: 370.1647; found: 370.1817.

#### 4e:

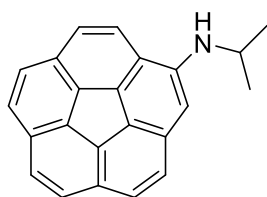

To a solution of monobromocorannulene (50 mg, 0.15 mmol) and KO<sup>t</sup>Bu (48 mg, 0.43 mmol) in toluene (5 mL), under an argon atmosphere, isopropylamine (2 mL) was added, and the mixture was degassed three times by evacuating the flask and backfilling with Ar. Pd(OAc)<sub>2</sub> (4 mg, 0.02 mmol) and BINAP (10 mg, 0.02 mmol) were added, and the mixture was heated to 30 °C. After 2 hours, the mixture was heated to 50 °C. After 10 hours, the reaction mixture was allowed to cool to RT, diluted with EtOAc (20 mL), and filtered through celite. The filtrate was washed with saturated aqueous NH<sub>4</sub>Cl (30 mL), and the aqueous phase was extracted with EtOAc (3 x 30 mL). The combined organic phase was washed with saturated aqueous NaCl (50 mL). The organic phase was dried over anhydrous Na<sub>2</sub>SO<sub>4</sub> and concentrated under reduced pressure. The residue was purified by column chromatography (eluent: petroleum ether to petroleum ether : EtOAc = 60 : 1) to afford **4e** (5 mg, 0.02 mmol, 11%).

$^1\text{H}$  NMR (400 MHz,  $\text{CDCl}_3$ )  $\delta$ : 7.55-7.88 (m, 8H), 6.69 (s, 1H), 3.95 (dt,  $J = 12.4, 6.2$  Hz, 1H), 1.41 (d,  $J = 5.7$  Hz, 6H).

$^{13}\text{C}$  NMR (100 MHz,  $\text{CDCl}_3$ )  $\delta$ : 136.4, 136.1, 135.9, 135.2, 131.0, 130.5, 128.7, 127.4, 127.1, 126.6, 126.5, 125.1, 123.3, 122.3, 53.9, 22.4.

MS-ESI: calculated for  $\text{C}_{23}\text{H}_{17}\text{N}$   $[\text{M}+\text{H}]^+$ : 308.1361; found: 308.1117.

**4f**:

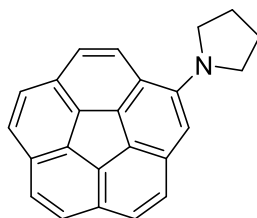

To a solution of monobromocorannulene (30 mg, 0.09 mmol) and  $\text{Cs}_2\text{CO}_3$  (60 mg, 0.18 mmol) in toluene (5 mL), pyrrolidine (3 mL) was added under an argon atmosphere, and the mixture was degassed three times by evacuating the flask and backfilling with argon.  $\text{Pd}(\text{OAc})_2$  (5 mg, 0.02 mmol) and BINAP (10 mg, 0.02 mmol) were added<sup>[S1]</sup>, and the mixture was heated to reflux. After 9 hours, the reaction mixture was allowed to cool to RT, diluted with EtOAc (20 mL), and filtered through celite. The filtrate was washed with saturated aqueous  $\text{NH}_4\text{Cl}$  (30 mL), and the aqueous phase was extracted with EtOAc (3 x 20 mL). The combined organic phase was washed with saturated aqueous NaCl (50 mL). The organic phase was dried over anhydrous  $\text{Na}_2\text{SO}_4$  and concentrated under reduced pressure. The residue was purified by column chromatography (eluent: petroleum ether : EtOAc = 50 : 1) to afford **4f** (16 mg, 0.05 mmol, 56%).

$^1\text{H}$  NMR (400 MHz,  $\text{CDCl}_3$ )  $\delta$ : 8.02 (d,  $J = 8.9$  Hz, 1H), 7.70-7.86 (m, 6H), 7.64 (d,  $J = 8.7$  Hz, 1H), 6.56 (s, 1H), 3.83 (t,  $J = 6.3$  Hz, 4H), 2.15 (t,  $J = 6.4$  Hz, 4H).

$^{13}\text{C}$  NMR (100 MHz,  $\text{CDCl}_3$ )  $\delta$ : 149.6, 136.8, 136.1, 135.6, 135.4, 133.8, 130.9, 130.8, 129.3, 128.2, 127.4, 127.3, 126.9, 126.8, 126.4, 126.2, 124.9, 124.7, 124.5, 101.0, 52.2, 26.1.

MS-ESI: calculated for  $\text{C}_{27}\text{H}_{14}\text{N}$   $[\text{M}+\text{H}]^+$ : 320.1361; found: 320.1117.

**4g**:

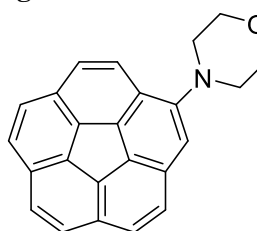

To a solution of monobromocorannulene (50 mg, 0.15 mmol) and KO<sup>t</sup>Bu (48 mg, 0.43 mmol) in toluene (4 mL), morpholine (40  $\mu\text{L}$ , 0.46 mmol) was added under an argon atmosphere, and the mixture was degassed three times by evacuating the flask and backfilling with Ar.  $\text{Pd}(\text{OAc})_2$  (4 mg, 0.02 mmol) and BINAP (10 mg, 0.02 mmol) were added, and the mixture was heated to reflux. After 9 hours, the reaction mixture was allowed to cool to RT, diluted with EtOAc (20 mL), and filtered through celite. The filtrate was washed with saturated aqueous  $\text{NH}_4\text{Cl}$  (30 mL), and the aqueous phase was extracted with EtOAc (3 x 30 mL). The combined organic phase was washed with saturated aqueous NaCl (50 mL). The organic phase was dried over anhydrous  $\text{Na}_2\text{SO}_4$  and concentrated under reduced pressure. The residue was purified by column chromatography (eluent: petroleum ether to petroleum ether : EtOAc = 20 : 1) to afford **4g** (36 mg, 0.11 mmol, 70%).

$^1\text{H}$  NMR (400 MHz,  $\text{CDCl}_3$ )  $\delta$ : 7.87 (d,  $J = 8.8$  Hz, 1H), 7.72-7.81 (m, 6H), 7.67 (d,  $J = 8.7$  Hz, 1H), 6.98 (s, 1H), 4.02-4.07 (m, 4H), 3.54 (s, 4H).

$^{13}\text{C}$  NMR (100 MHz,  $\text{CDCl}_3$ )  $\delta$ : 151.9, 137.4, 136.3, 136.1, 135.6, 132.3, 131.9, 130.8, 129.6, 129.1, 127.3, 127.0, 126.8, 126.7, 126.1, 125.6, 108.1, 67.1, 53.5.

MS-ESI: calculated for  $\text{C}_{27}\text{H}_{17}\text{NO}$   $[\text{M}+\text{Na}]^+$ : 358.1310; found: 358.3291.

**4h:**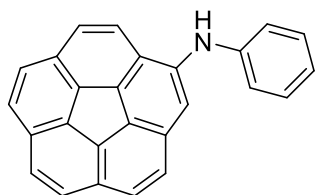

To a solution of monobromocorannulene (50 mg, 0.15 mmol) and KO<sup>t</sup>Bu (48 mg, 0.43 mmol) in toluene (5 mL), under an argon atmosphere, aniline (2 mL) was added, and the mixture was degassed three times by evacuating the flask and backfilling with Ar. Pd(OAc)<sub>2</sub> (4 mg, 0.02 mmol) and BINAP (10 mg, 0.02 mmol) were added, and the mixture was heated to reflux. After 9 hours, the reaction mixture was allowed to cool to RT, diluted with EtOAc (20 mL), and filtered through celite. The filtrate was washed with aqueous HCl (1M, 30 mL), and the aqueous phase was extracted with EtOAc (3 x 30 mL). The combined organic phase was washed with saturated aqueous NaCl (50 mL). The organic phase was dried over anhydrous Na<sub>2</sub>SO<sub>4</sub> and concentrated under reduced pressure. The residue was purified by column chromatography (eluent: petroleum ether to petroleum ether : EtOAc = 20 : 1) to afford **4h** (20 mg, 0.06 mmol, 39%).

<sup>1</sup>H NMR (400 MHz, CDCl<sub>3</sub>) δ: 7.72-7.84 (m, 7H), 7.62 (d, *J* = 8.7 Hz, 1H), 7.30-7.45 (m, 5H), 7.04 (dt, *J* = 8.4, 4.4 Hz, 1H).

<sup>13</sup>C NMR (150 MHz, CDCl<sub>3</sub>) δ: 144.7, 135.8, 130.9, 130.9, 129.5, 129.4, 128.9, 128.3, 127.9, 127.6, 127.5, 127.3, 127.1, 127.0, 126.9, 126.8, 126.7, 126.6, 126.4, 126.1, 126.1, 125.7, 124.9, 124.1, 123.3, 121.9, 117.7.

MS-ESI: calculated for C<sub>26</sub>H<sub>15</sub>N [M+H]<sup>+</sup>: 342.1204; found: 342.1251.

**4i:**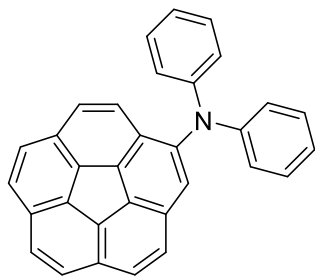

To a solution of monobromocorannulene (50 mg, 0.15 mmol) and KO<sup>t</sup>Bu (45 mg, 0.40 mmol) in toluene (5 mL), diphenylamine (6 mg, 0.04 mmol) was added under an argon atmosphere, and the mixture was degassed three times by evacuating the flask and backfilling with Ar. Pd(OAc)<sub>2</sub> (5 mg, 0.02 mmol) and BINAP (10 mg, 0.02 mmol) were added, and the mixture was heated to reflux. After 9 hours, the reaction mixture was allowed to cool to RT, diluted with EtOAc (20 mL), and filtered through celite. The filtrate was washed with saturated aqueous NH<sub>4</sub>Cl (30 mL), and the aqueous phase was extracted with EtOAc (3 x 30 mL). The combined organic phase was washed with saturated aqueous NaCl (50 mL). The organic phase was dried over anhydrous Na<sub>2</sub>SO<sub>4</sub> and concentrated under reduced pressure. The residue was purified by column chromatography (eluent: petroleum ether to petroleum ether : EtOAc = 20 : 1) to afford **4i** (12 mg, 0.03 mmol, 78%).

<sup>1</sup>H NMR (400 MHz, CDCl<sub>3</sub>) δ: 7.69-7.86 (m, 6H), 7.59 (dd, *J* = 14.7, 8.8 Hz, 2H), 7.51 (d, *J* = 8.9 Hz, 1H), 7.16 – 7.32 (m, 8H), 7.04 (t, *J* = 7.3 Hz, 2H).

<sup>13</sup>C NMR (100 MHz, CDCl<sub>3</sub>) δ: 149.0, 146.4, 137.5, 136.2, 135.9, 135.8, 133.2, 131.8, 131.7, 130.9, 130.8, 130.2, 129.3, 127.3, 127.1, 127.1, 126.9, 126.7, 125.7, 124.0, 122.8, 121.8, 120.4.

MS-ESI: calculated for C<sub>23</sub>H<sub>19</sub>N [M+H]<sup>+</sup>: 418.1517; found: 418.1823.

**4j:**

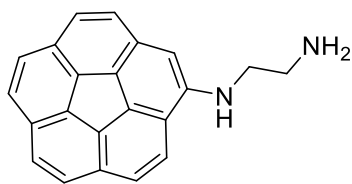

Monobromocorannulene (566mg, 1.7 mmol), Pd(dba)<sub>2</sub><sup>[s21]</sup> (98 mg, 0.17 mmol), BINAP (105 mg, 1.7 mmol), and NaO<sup>t</sup>Bu (660 mg, 6.9 mmol) were added to a dried sealed tube, toluene (10 mL) was added. After stirring at RT for 30 minutes, ethylenediamine (1 mL) was added. Then, the mixture was heated to 110 °C. After 8 hours, the reaction mixture was allowed to cool to RT, diluted with DCM (50 mL), and washed with H<sub>2</sub>O (3 x 100 mL), and the aqueous phase was extracted with DCM (3 x 100mL). The combined organic phase was dried over anhydrous Na<sub>2</sub>SO<sub>4</sub> and concentrated under reduced pressure. The residue was purified by column chromatography (eluent: PE: TEA = 250: 1 to DCM: MeOH = 5:1) to afford brown oil, and then precipitate in the mixed solvent of DCM and *n*-Hexane to give **4j** (204 mg, 0.66 mmol, 39%).

<sup>1</sup>H NMR (400 MHz, CD<sub>3</sub>OD) δ: 8.05 (d, *J* = 8.8 Hz, 1H), 7.86-7.80 (m, 3H), 7.76-7.66 (m, 3H), 7.61 (d, *J* = 8.7 Hz, 1H), 6.66 (s, 1H), 3.64 (t, *J* = 6.1 Hz, 2H), 3.27 (t, *J* = 6.1 Hz, 2H).

<sup>13</sup>C NMR (100 MHz, DMSO-*d*<sub>6</sub>) δ: 148.2, 137.4, 137.0, 136.8, 135.9, 135.4, 132.1, 131.7, 130.4, 129.6, 128.2, 128.2, 127.4, 127.4, 127.1, 125.7, 124.6, 124.2, 100.2, 43.6, 39.7.

MS-ESI: calculated for C<sub>22</sub>H<sub>16</sub>N<sub>2</sub> [M+H]<sup>+</sup>: 309.1313; found: 309.1391.

**5a:**

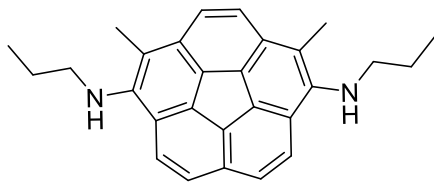

1,6-dibromo-2,5-dimethylcorannulene (70 mg, 0.16 mmol), Pd(OAc)<sub>2</sub> (11 mg, 0.05 mmol), BINAP (30 mg, 0.05 mmol), and KO<sup>t</sup>Bu (72 mg, 0.64 mmol) were added to a dried sealed tube, toluene (5 mL) and propylamine (2 mL) was added, and stirring at rt for 30 minutes. Then, the mixture was heated to 110 °C. After 10 hours, the reaction mixture was allowed to cool to RT, diluted with DCM (30 mL), and filtered through celite. The filtrate was washed with saturated aqueous NH<sub>4</sub>Cl (50 mL), and the aqueous phase was extracted with DCM (3 x 40 mL). The combined organic phase was washed with saturated aqueous NaCl (100 mL). The organic phase was dried over anhydrous Na<sub>2</sub>SO<sub>4</sub> and concentrated under reduced pressure. The residue was purified by column chromatography (eluent: petroleum ether to petroleum ether : EtOAc = 50 : 1) to afford **5a** (33 mg, 0.08 mmol, 53%).

<sup>1</sup>H NMR (400 MHz, CDCl<sub>3</sub>) δ: 7.94 (d, *J* = 8.8 Hz, 2H), 7.76 (s, 2H), 7.73 (d, *J* = 8.8 Hz, 2H), 3.76 (s, 4H), 2.61 (s, 6H), 1.82-1.93 (m, 4H), 1.13 (t, *J* = 7.4 Hz, 6H).

<sup>13</sup>C NMR (100 MHz, CDCl<sub>3</sub>) δ: 143.6, 136.2, 135.4, 130.5, 130.4, 130.1, 127.3, 125.9, 125.4, 125.0, 116.1, 53.4, 24.7, 12.72, 11.7. MS-ESI: calculated for C<sub>28</sub>H<sub>28</sub>N<sub>2</sub> [M+H]<sup>+</sup>: 339.2252; found: 339.2040.

**5b:**

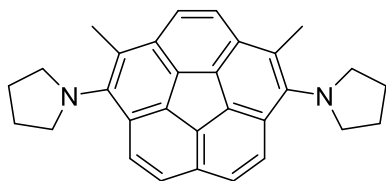

1,6-dibromo-2,5-dimethylcorannulene (70 mg, 0.16 mmol), Pd(OAc)<sub>2</sub> (11 mg, 0.05 mmol), BINAP (30 mg, 0.05 mmol), and KO<sup>t</sup>Bu (72 mg, 0.64 mmol) were added to a dried sealed tube, toluene (5 mL) and pyrrolidine (2 mL) was added, and stirring at RT for 30 minutes. Then, the mixture was heated to 110 °C. After 10 hours, the reaction mixture was allowed to cool to RT, diluted with DCM

(30 mL), and filtered through celite. The filtrate was washed with saturated aqueous  $\text{NH}_4\text{Cl}$  (50 mL), and the aqueous phase was extracted with DCM (3 x 40 mL). The combined organic phase was washed with saturated aqueous  $\text{NaCl}$  (100 mL). The organic phase was dried over anhydrous  $\text{Na}_2\text{SO}_4$  and concentrated under reduced pressure. The residue was purified by column chromatography (eluent: petroleum ether to petroleum ether : EtOAc = 50 : 1) to afford **5b** (37 mg, 0.09 mmol, 56%).

$^1\text{H}$  NMR (400 MHz,  $\text{CDCl}_3$ )  $\delta$ : 7.86 (s, 2H), 7.80 (d,  $J$  = 8.6 Hz, 2H), 7.68 (d,  $J$  = 8.6 Hz, 2H), 3.56 (s, 8H), 2.76 (s, 6H), 2.18 (s, 8H).

$^{13}\text{C}$  NMR (100 MHz,  $\text{CDCl}_3$ )  $\delta$ : 144.4, 137.9, 136.0, 132.2, 131.9, 131.6, 131.3, 129.7, 125.7, 125.2, 125.0, 53.0, 26.7, 14.2.

MS-ESI: calculated for  $\text{C}_{30}\text{H}_{28}\text{N}_2$   $[\text{M}+\text{H}]^+$ : 417.2252; found: 417.2026.

### 5c:

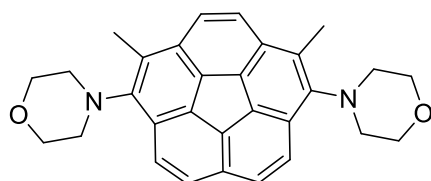

1,6-dibromo-2,5-dimethylcorannulene (70 mg, 0.16 mmol),  $\text{Pd}(\text{OAc})_2$  (11 mg, 0.05 mmol), BINAP (30 mg, 0.05 mmol), and  $\text{KO}^t\text{Bu}$  (72 mg, 0.64 mmol) were added to a dried sealed tube, toluene (5 mL) and morpholine (2 mL) was added, and stirring at RT for 30

minutes. Then, the mixture was heated to 110 °C. After 10 hours, the reaction mixture was allowed to cool to RT, diluted with DCM (30 mL), and filtered through celite. The filtrate was washed with saturated aqueous  $\text{NH}_4\text{Cl}$  (50 mL), and the aqueous phase was extracted with DCM (3 x 40 mL). The combined organic phase was washed with saturated aqueous  $\text{NaCl}$  (100 mL). The organic phase was dried over anhydrous  $\text{Na}_2\text{SO}_4$  and concentrated under reduced pressure. The residue was purified by column chromatography (eluent: petroleum ether to petroleum ether : EtOAc = 50 : 1) to afford **5c** (27 mg, 0.06 mmol, 38%).

$^1\text{H}$  NMR (400 MHz,  $\text{CDCl}_3$ )  $\delta$ : 8.06 (d,  $J$  = 8.9 Hz, 2H), 7.89 (s, 2H), 7.74 (d,  $J$  = 8.9 Hz, 2H), 4.01 (t,  $J$  = 4.5 Hz, 8H), 3.48 (s, 8H), 2.87 (s, 6H).

$^{13}\text{C}$  NMR (100 MHz,  $\text{CDCl}_3$ )  $\delta$ : 145.0, 136.9, 135.7, 132.4, 131.6, 131.5, 131.0, 129.5, 126.2, 125.5, 67.9, 52.5, 14.3.

MS-ESI: calculated for  $\text{C}_{30}\text{H}_{28}\text{N}_2\text{O}_2$   $[\text{M}+\text{H}]^+$ : 449.2152; found: 449.1959.

### 5d:

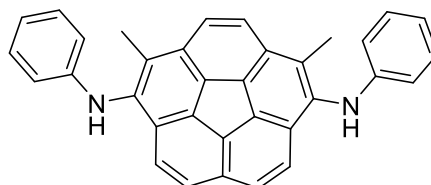

Dibromocorannulene (70 mg, 0.16 mmol),  $\text{Pd}(\text{OAc})_2$  (11 mg, 0.05 mmol), BINAP (30 mg, 0.05 mmol), and  $\text{KO}^t\text{Bu}$  (72 mg, 0.64 mmol) were added to a dried sealed tube, toluene (5 mL) and aniline (2 mL) was added, and stirring at RT for 30 minutes.

Then, the mixture was heated to 110 °C. After 10 hours, the reaction mixture was allowed to cool to RT, diluted with DCM (30 mL), and filtered through celite. The filtrate was washed with saturated aqueous  $\text{NH}_4\text{Cl}$  (50 mL), and the aqueous phase was extracted with DCM (3 x 40 mL). The combined organic phase was washed with saturated aqueous  $\text{NaCl}$  (100 mL). The organic phase was dried over anhydrous  $\text{Na}_2\text{SO}_4$  and concentrated under reduced pressure. The residue was purified by column chromatography (eluent: petroleum ether to petroleum ether : EtOAc = 50 : 1) to afford **5d** (37 mg, 0.08 mmol, 50%).



$^1\text{H}$  NMR (400 MHz,  $\text{CDCl}_3$ )  $\delta$ : 7.83 (s, 2H), 7.56 (q,  $J = 8.8$  Hz, 4H), 7.23-7.30 (m, 5H), 7.06 (s, 4H), 6.91 (s, 2H), 2.68 (s, 6H).

$^{13}\text{C}$  NMR (100 MHz,  $\text{CDCl}_3$ )  $\delta$ : 135.4, 132.6, 130.2, 129.4, 126.7, 125.4, 125.2, 115.8, 29.7.

MS-ESI: calculated for  $\text{C}_{34}\text{H}_{24}\text{N}_2$   $[\text{M}+\text{H}]^+$ : 461.1939; found: 461.1623.

**5e:**

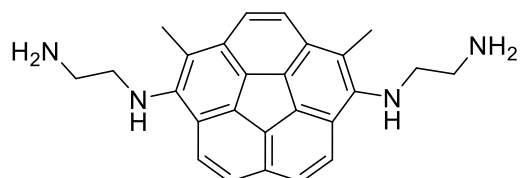

1,6-dibromo-2,5-dimethylcorannulene (23 mg, 0.05 mmol),  $\text{Pd}(\text{dba})_2$  (3 mg, 0.005 mmol), BINAP (3 mg, 0.005 mmol), and  $\text{NaO}^t\text{Bu}$  (21 mg, 0.22 mmol) were added to a dried sealed tube, toluene (3 mL) was added. After stirring at

RT for 30 minutes, ethylenediamine (24  $\mu\text{L}$ , 0.36 mmol) was added. Then, the mixture was heated to 110  $^\circ\text{C}$ . After 12 hours, the reaction mixture was allowed to cool to RT, diluted with DCM (20 mL), and filtered through celite. The filtrate was washed with  $\text{H}_2\text{O}$  (3 x 50 mL), and the aqueous phase was extracted with DCM (3 x 30 mL). The combined organic phase was dried over anhydrous  $\text{Na}_2\text{SO}_4$  and concentrated under reduced pressure. The residue was purified by column chromatography (eluent: DCM: MeOH: TEA = 150: 30: 1) to afford brown oil, and then precipitate in the mixed solvent of methanol and cyclopentane to give **5e** (3 mg, 0.008 mmol, 15%).

$^1\text{H}$  NMR (400 MHz,  $\text{CD}_3\text{OD}$ )  $\delta$ : 7.94 (d,  $J = 8.8$  Hz, 2H), 7.81 (s, 2H), 7.76 (d,  $J = 8.8$  Hz, 2H), 3.83 (t,  $J = 6.4$  Hz, 4H), 3.17 (t,  $J = 6.4$  Hz, 4H), 2.65 (s, 6H).

$^{13}\text{C}$  NMR (100 MHz,  $\text{DMSO}-d_6$ )  $\delta$ : 143.7, 134.6, 130.4, 129.8, 129.7, 127.3, 126.1, 125.8, 125.5, 117.1, 52.1, 48.8, 13.1.

MS-ESI: calculated for  $\text{C}_{26}\text{H}_{26}\text{N}_4$   $[\text{M}+\text{H}]^+$ : 395.2157; found: 395.2240.

### 2,5-dimethylcorannulene:

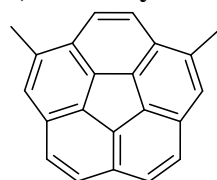

A solution of 1,6-dibromo-2,5-dimethylcorannulene (105 mg, 0.24 mmol) in anhydrous THF (5 mL) was cooled to -78  $^\circ\text{C}$  under argon atmosphere using an acetone dry-ice bath,  $n\text{-BuLi}$  (3M, 0.1 mL) was added dropwise. Anhydrous DMF (0.03 mL) was added slowly to the reaction mixture after stirring at -78  $^\circ\text{C}$  for 1 hour. After 1h at -78  $^\circ\text{C}$ , the mixture was brought back to RT and the reaction was quenched by carefully adding aqueous HCl (1M, 10 mL), and washed with saturated aqueous NaCl (100 mL), and the aqueous phase was extracted with DCM (3 x 50 mL). The organic layer was dried over anhydrous  $\text{Na}_2\text{SO}_4$ . Then the crude product was purified by chromatography on silica gel with petroleum ether to afford 2,5-dimethylcorannulene<sup>[s3, s4]</sup> (30 mg, 0.11 mmol, 45%).

$^1\text{H}$  NMR (400 MHz,  $\text{CDCl}_3$ )  $\delta$ : 7.94 (s, 2H), 7.71 (dd,  $J = 23.9, 8.7$  Hz, 4H), 7.56 (s, 2H), 2.84 (s, 6H);

$^{13}\text{C}$  NMR (100 MHz,  $\text{CDCl}_3$ )  $\delta$ : 136.6, 136.0, 135.4, 134.9, 131.5, 130.6, 129.9, 127.0, 126.2, 125.7, 124.8, 18.8.

### 3. Optical data and spectra

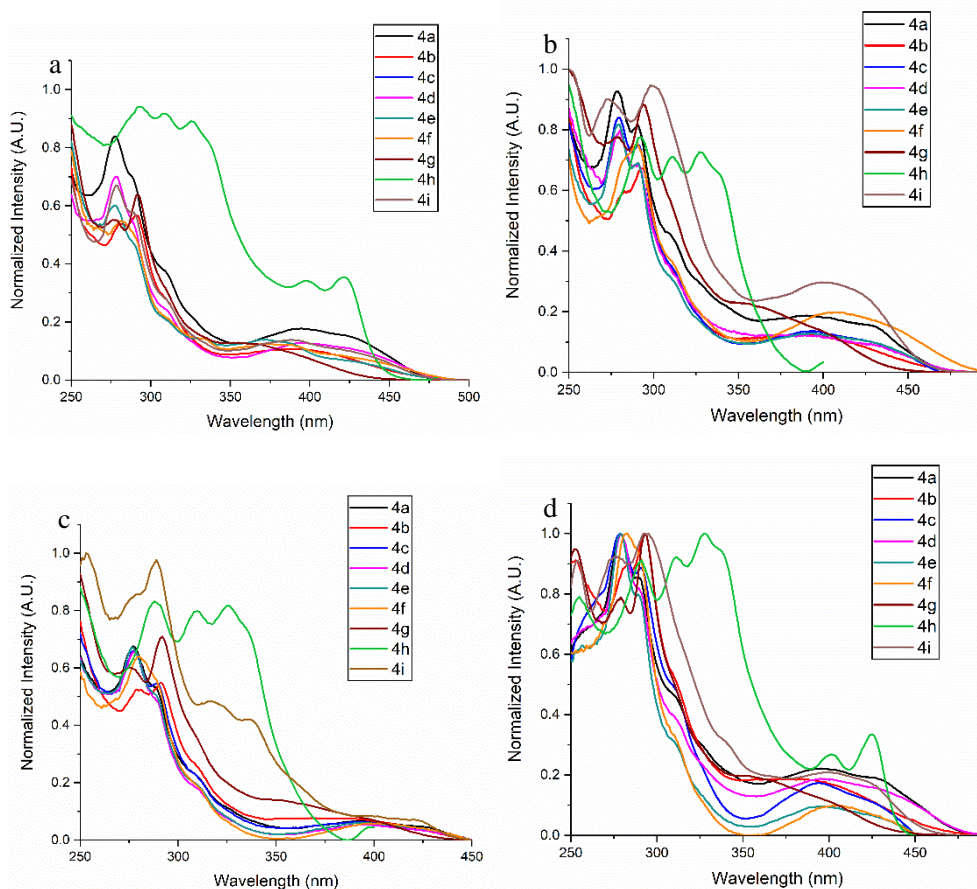

**Fig. S1** Excitation spectra of **4a-i** in CH<sub>3</sub>CN (a), DCM (b), MeOH (c), THF (d) at RT.

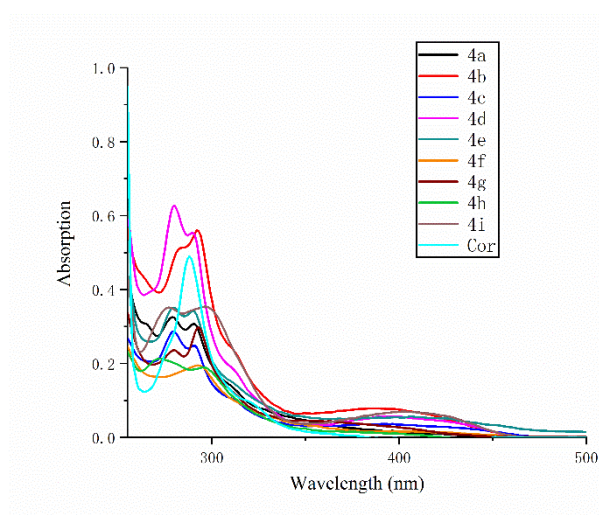

**Fig. S2** UV spectra of **4a-i** and **Cor** in DCM at RT.

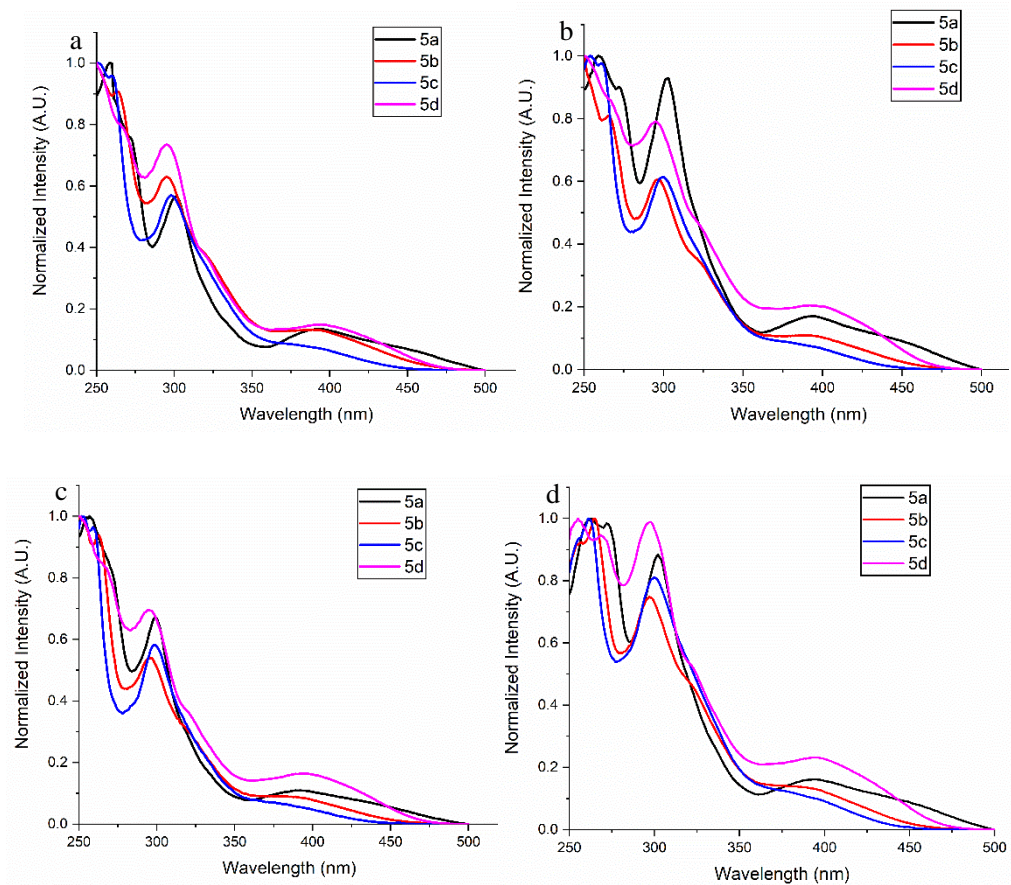

**Fig. S3** Excitation spectra of **5a-d** in CH<sub>3</sub>CN (a), DCM (b), MeOH (c), THF (d) at RT.

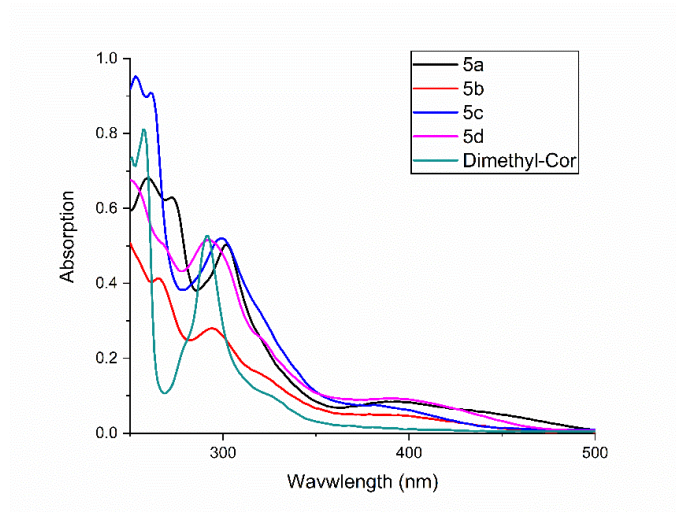

**Fig. S4** UV spectra of **5a-d** and **2,5-dimethylcorannulene** in DCM at RT.



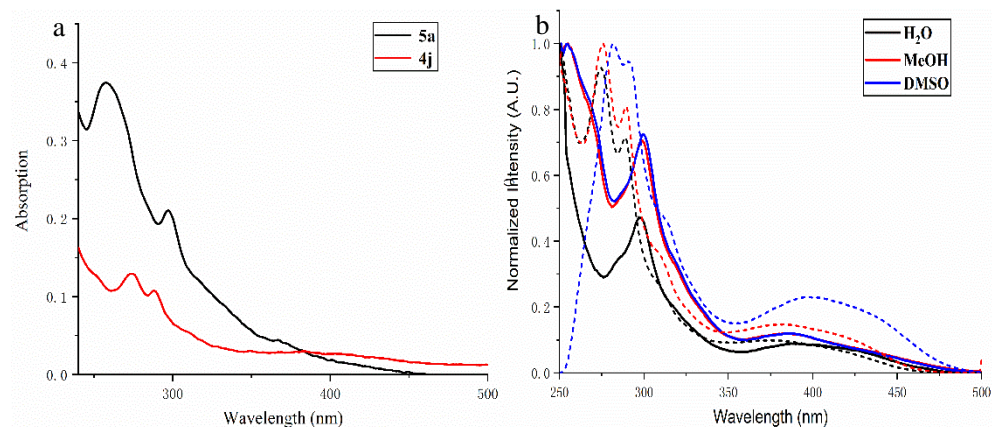

**Fig. S5** (a) UV spectra of **4j** and **5a** in H<sub>2</sub>O at  $\sim 10^{-5}$  M. (b) Excitation spectra of **4j** (dashed lines) and **5e** (solid lines) at RT.

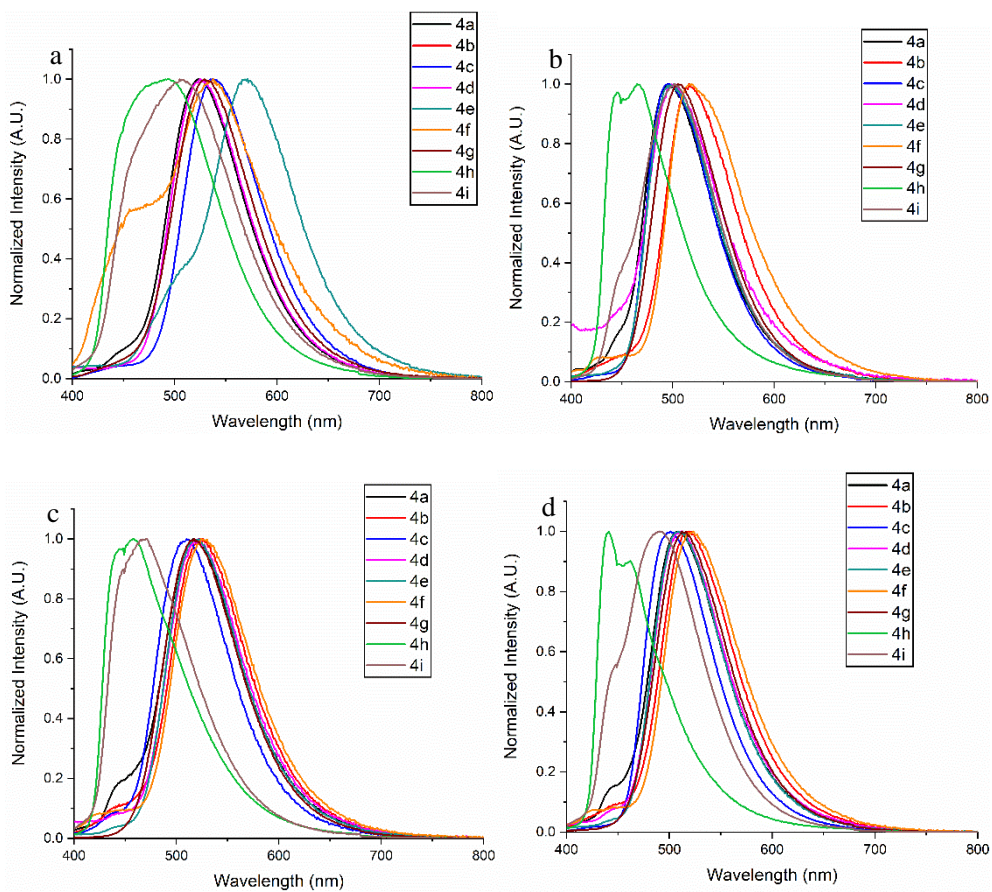

**Fig. S6** Emission spectra of **4a-i** in CH<sub>3</sub>CN (a), DCM (b), MeOH (c), THF (d) at RT.

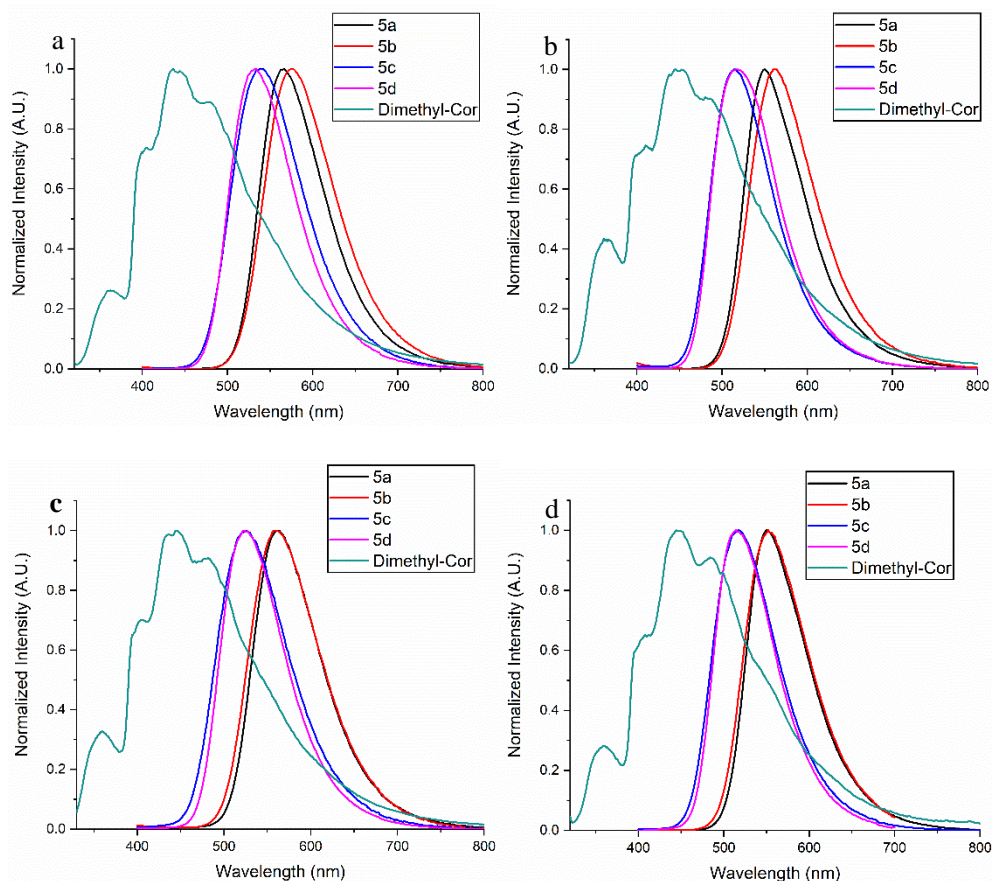

**Fig. S7** Emission spectra of **5a-d** and **2,5-dimethylcorannulene** in  $\text{CH}_3\text{CN}$  (a),  $\text{DCM}$  (b),  $\text{MeOH}$  (c),  $\text{THF}$  (d) at RT.

**Table S1.** Optical properties of **4a-j**, **5a-e**.<sup>a-d</sup>

|                          | -NR <sup>1</sup> R <sup>2</sup>                   | $\lambda_{\text{max}}(\text{abs})^{\text{e}}$ | $\epsilon_{\text{max}}^{\text{f}}$ | $\lambda_{\text{max}}(\text{ex})$ | $\lambda_{\text{max}}(\text{em})$ | $\Phi(\%)$ | Stokes shift |
|--------------------------|---------------------------------------------------|-----------------------------------------------|------------------------------------|-----------------------------------|-----------------------------------|------------|--------------|
| <b>Cor</b>               | —                                                 | 288                                           | 4.9                                | 289                               | 436                               | 1          | 147          |
| <b>4a</b>                | NHPr                                              | 291                                           | 1.2                                | 290                               | 494                               | 15         | 204          |
| <b>4b</b>                | NEt <sub>2</sub>                                  | 292                                           | 3.4                                | 293                               | 517                               | 13         | 224          |
| <b>4c</b>                | NH <sup>t</sup> Bu                                | 292                                           | 1.4                                | 291                               | 497                               | 18         | 206          |
| <b>4d</b>                | NHCy                                              | 292                                           | 6.9                                | 291                               | 501                               | 7          | 210          |
| <b>4e</b>                | NH <sup>i</sup> Pr                                | 290                                           | 0.4                                | 291                               | 499                               | 17         | 208          |
| <b>4f</b>                | pyr                                               | 293                                           | 2.4                                | 290                               | 518                               | 17         | 228          |
| <b>4g</b>                | morph                                             | 294                                           | 2.1                                | 294                               | 502                               | 18         | 208          |
| <b>4h</b>                | NHPh                                              | 295                                           | 0.2                                | 295                               | 465                               | 18         | 170          |
| <b>4i</b>                | NPh <sub>2</sub>                                  | 296                                           | 2.4                                | 298                               | 502                               | 25         | 204          |
| <b>4j</b>                | NH(CH <sub>2</sub> ) <sub>2</sub> NH <sub>2</sub> | 288                                           | 1.3                                | 289                               | 517                               | 9          | 228          |
| <b>CorMe<sub>2</sub></b> | —                                                 | 292                                           | 3.1                                | 294                               | 423                               | 2          | 129          |
| <b>5a</b>                | NHPr                                              | 292                                           | 2.2                                | 303                               | 552                               | 14         | 249          |
| <b>5b</b>                | pyr                                               | 294                                           | 1.6                                | 297                               | 562                               | 6          | 265          |
| <b>5c</b>                | morph                                             | 299                                           | 1.7                                | 299                               | 516                               | 8          | 217          |
| <b>5d</b>                | NHPh                                              | 292                                           | 6.4                                | 295                               | 518                               | 17         | 223          |
| <b>5e</b>                | NH(CH <sub>2</sub> ) <sub>2</sub> NH <sub>2</sub> | 297                                           | 1.5                                | 297                               | 560                               | 11         | 263          |

<sup>a</sup> All  $\lambda$  values in nm. <sup>b</sup> All measurements made at  $\sim 10^{-5}$  M. <sup>c</sup> All measurements made in  $\text{CH}_2\text{Cl}_2$ , except **4j** and **5e**, which was measured in  $\text{H}_2\text{O}$  for solubility reasons. <sup>d</sup> **Cor** = corannulene; **CorMe<sub>2</sub>** = 2,5-dimethylcorannulene; **Cy** = cyclohexyl; pyr = pyrrolidiny; morph = morpholinyl. <sup>e</sup>  $\lambda_{\text{max}}(\text{abs})$  are the longest  $\lambda$  well-resolved absorbances. <sup>f</sup>  $(\text{M}^{-1}\text{cm}^{-1}) \times 10^4$ .

**Table S2.** Lifetime of **4a-i**, **5a-d**, and **2,5-dimethylcorannulene**.<sup>a,b</sup>

|          | <b>4a</b> | <b>4b</b> | <b>4c</b> | <b>4d</b> | <b>4e</b> | <b>4f</b> | <b>4g</b> | <b>4h</b> | <b>4i</b> | <b>CorMe<sub>2</sub><sup>c</sup></b> | <b>5a</b> | <b>5b</b> | <b>5c</b> | <b>5d</b> |
|----------|-----------|-----------|-----------|-----------|-----------|-----------|-----------|-----------|-----------|--------------------------------------|-----------|-----------|-----------|-----------|
| $\tau_f$ | 6.3       | 7.8       | 7.5       | 7.6       | 5.6       | 6.1       | 6.9       | 5.0       | 8.3       | 6.6                                  | 7.9       | 4.0       | 4.2       | 7.3       |
| $\chi^2$ | 1.11      | 1.12      | 1.05      | 1.11      | 0.92      | 1.15      | 0.96      | 1.08      | 0.96      | 1.09                                 | 0.97      | 1.01      | 1.03      | 1.10      |

<sup>a</sup> Lifetime in ns. <sup>b</sup> All measurements made in CH<sub>2</sub>Cl<sub>2</sub> at RT. <sup>c</sup> **CorMe<sub>2</sub>** = 2,5-dimethylcorannulene.

**Table S3.** Photophysical parameters of **4j** and **5e**.<sup>a</sup>

| <b>S<sup>b</sup></b> | $\lambda_{\max}(\text{em})^c$ |           | $\Phi$ (%) |           | $\tau_f^d$ |           | $\chi^2$  |           |
|----------------------|-------------------------------|-----------|------------|-----------|------------|-----------|-----------|-----------|
|                      | <b>4j</b>                     | <b>5e</b> | <b>4j</b>  | <b>5e</b> | <b>4j</b>  | <b>5e</b> | <b>4j</b> | <b>5e</b> |
| MeOH                 | 501                           | 544       | 11         | 10        | 8.0        | 8.6       | 1.08      | 0.89      |
| DMSO                 | 533                           | 571       | 23         | 17        | 12.8       | 12.7      | 1.13      | 0.93      |
| H <sub>2</sub> O     | 517                           | 560       | 9          | 11        | 11.2       | 11.3      | 0.98      | 1.19      |

<sup>a</sup> Room temperature. <sup>b</sup> S = solvent, <sup>c</sup>  $\lambda$  values in nm. <sup>d</sup> Lifetime in ns.

## 4. References

- S1. Sun, N.; Chen, H.; Li, X.; Xu, M.; Gan, Y.; Zhang, L.; Liu, Y. *J. Org. Chem.*, 2017, **82**, 10051.
- S2. Abel, A. S.; Averin, A. D.; Cheprakov, A. V.; Roznyatovsky, V. A.; Denat, F.; Bessmertnykh-Lemeune, A.; Beletskaya, I. P. *Org. Biomol. Chem.*, 2019, **17**, 4243.
- S3. Seiders, T. J.; Baldrige, K. K.; Siegel, J. S. *J. Am. Chem. Soc.*, 1996, **118**, 2754.
- S4. Seiders, T. J.; Elliott, E. L.; Grube, G. H.; Siegel, J. S. *J. Am. Chem. Soc.*, 1999, **121**, 7804.

## 5. $^1\text{H}$ NMR and $^{13}\text{C}$ NMR spectra

Compound **4a** ( $\text{CDCl}_3$ ):

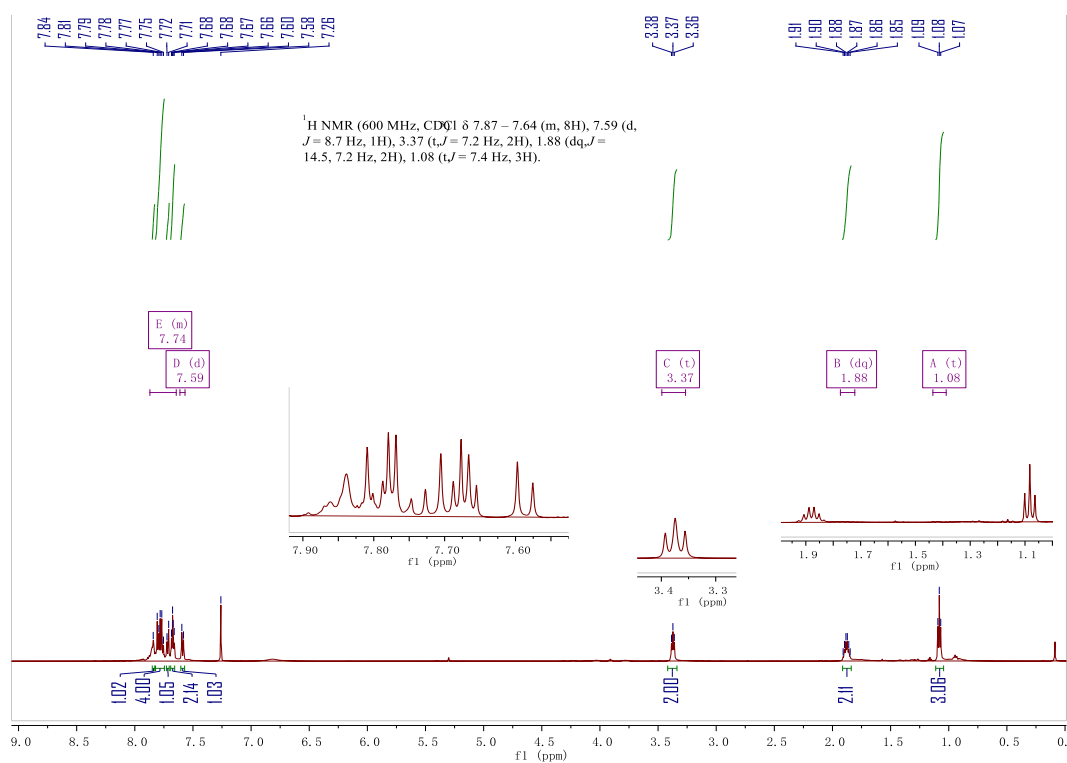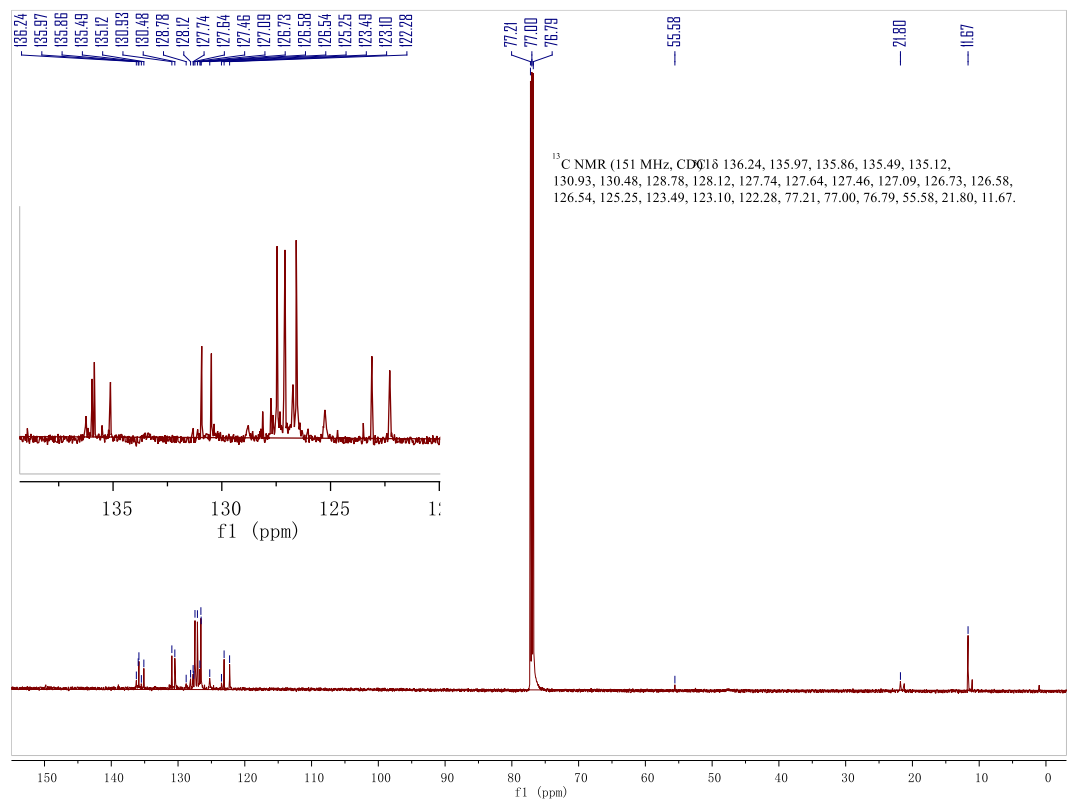

Compound **4b** (CDCl<sub>3</sub>):

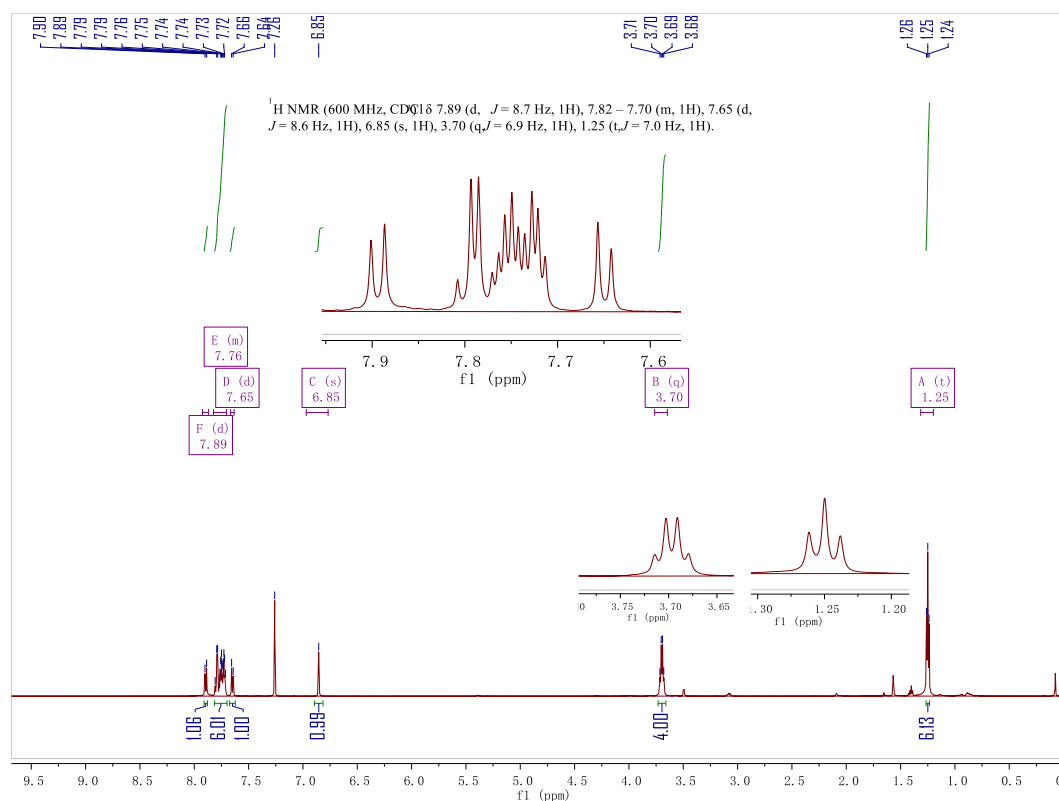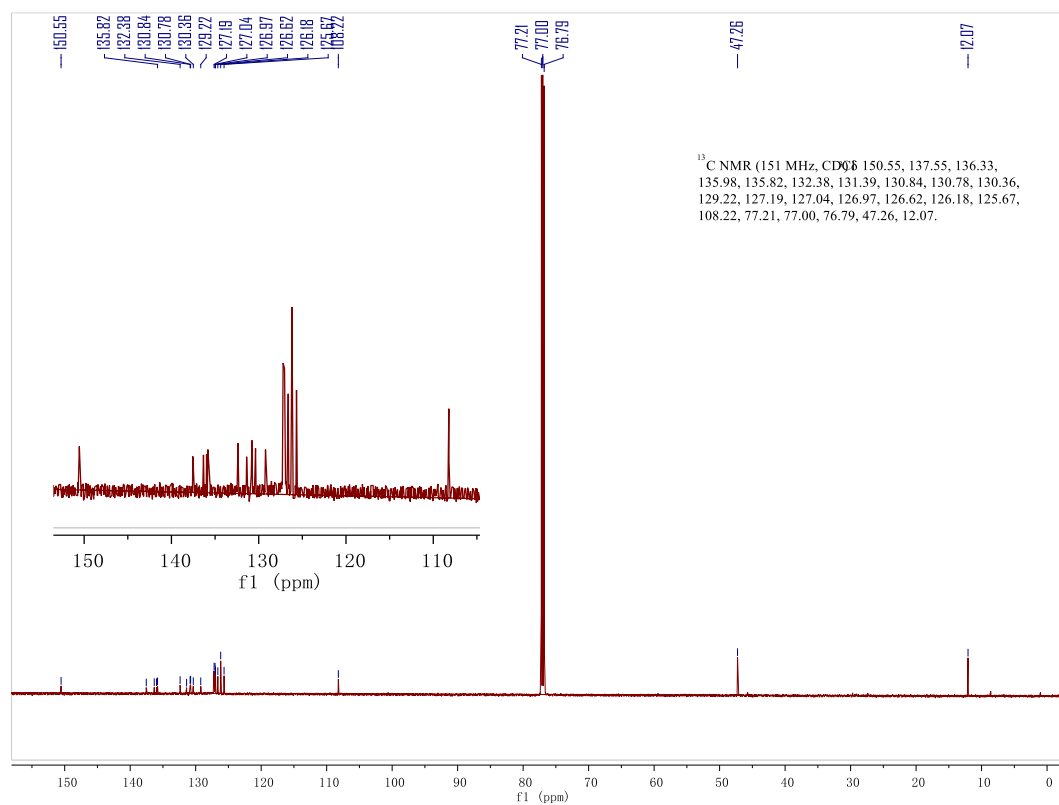



Compound **4c** (CDCl<sub>3</sub>):

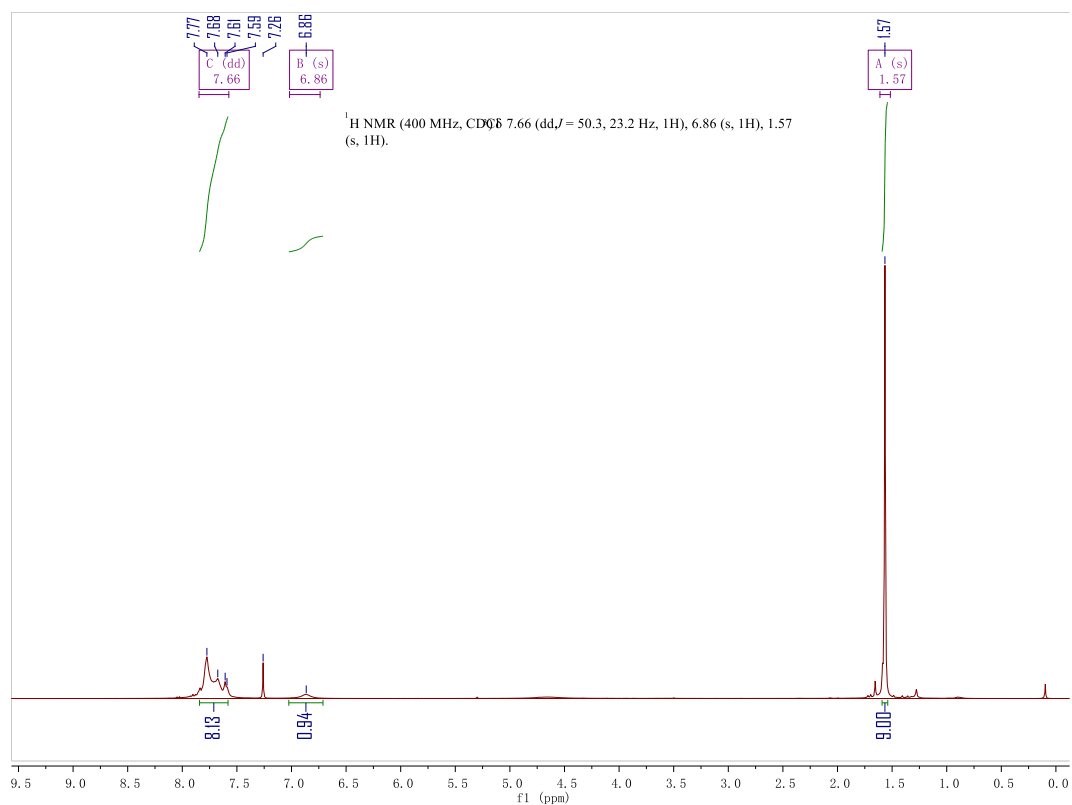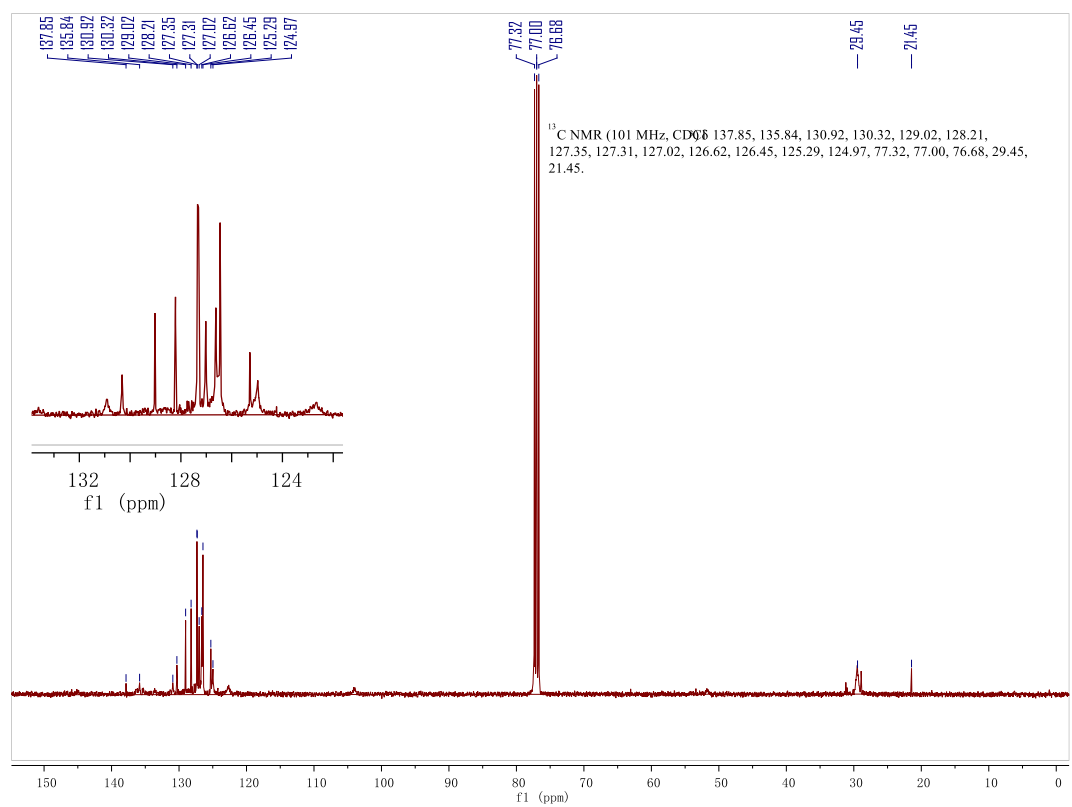

Compound **4d** (CDCl<sub>3</sub>):

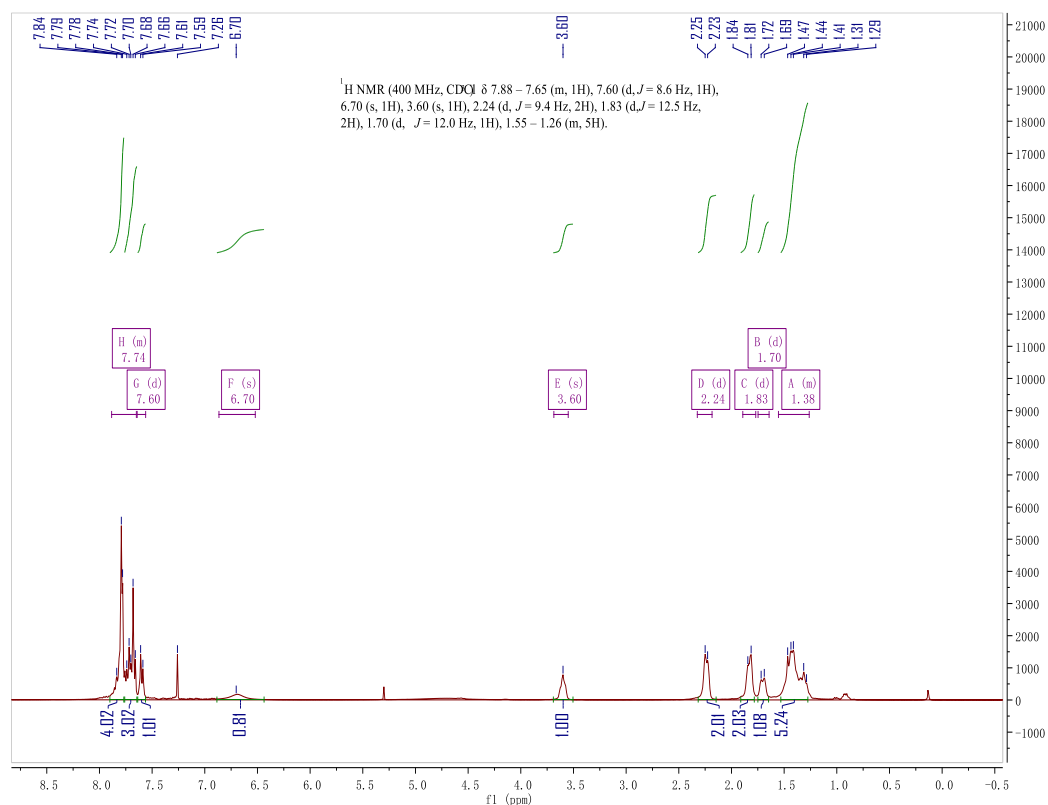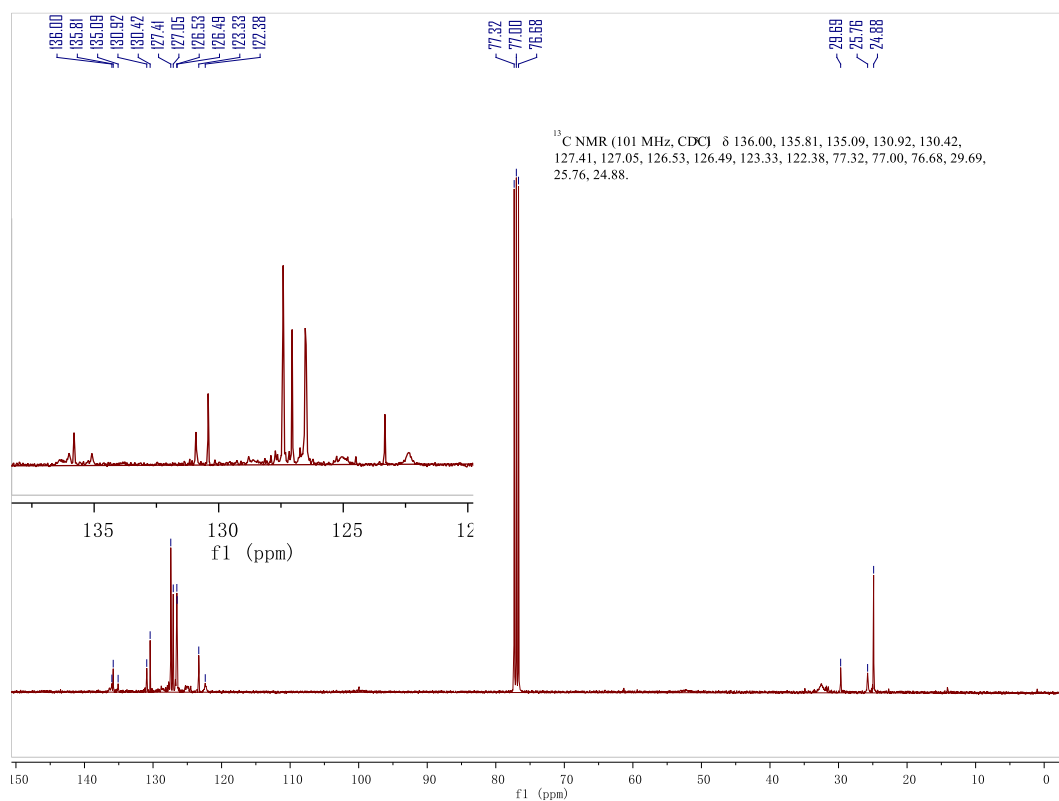

Compound 4e (CDCl<sub>3</sub>):

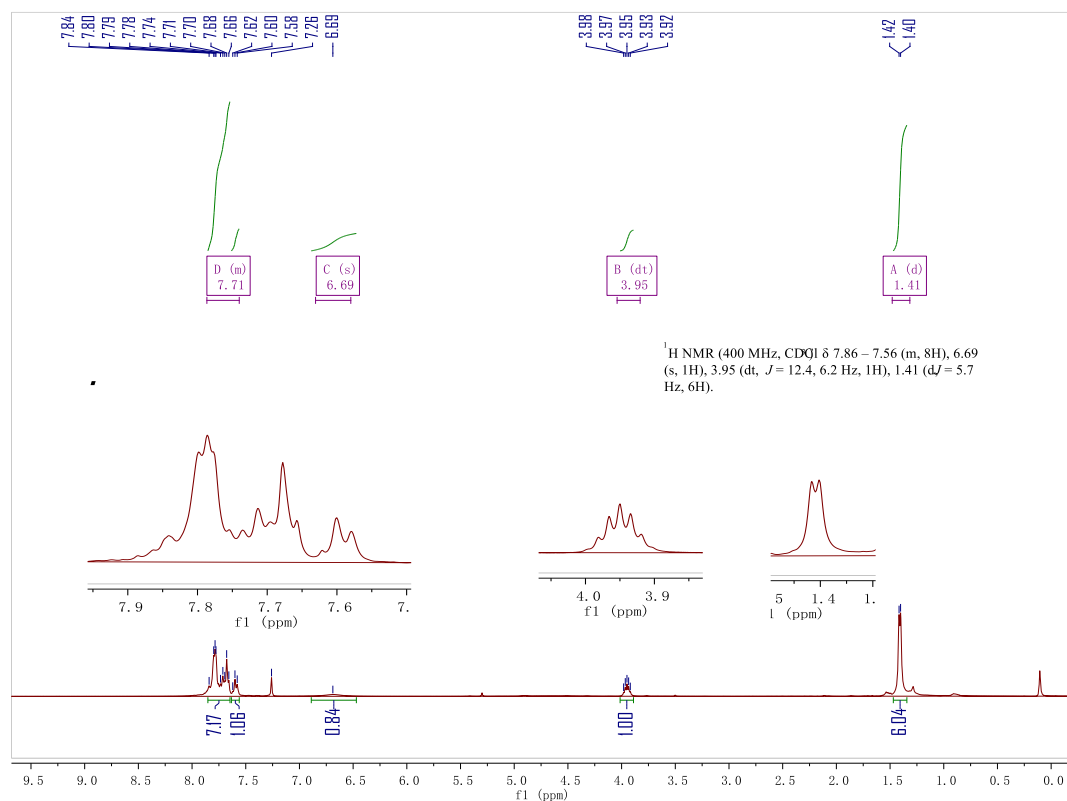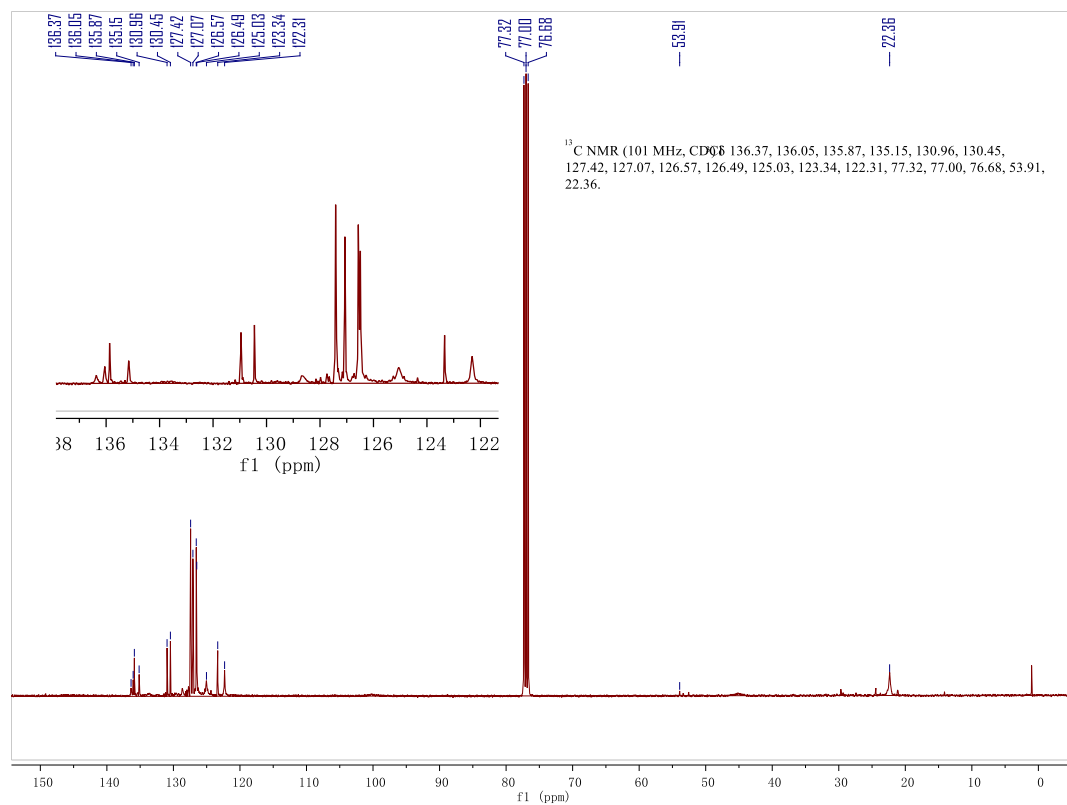

Compound **4f** (CDCl<sub>3</sub>):

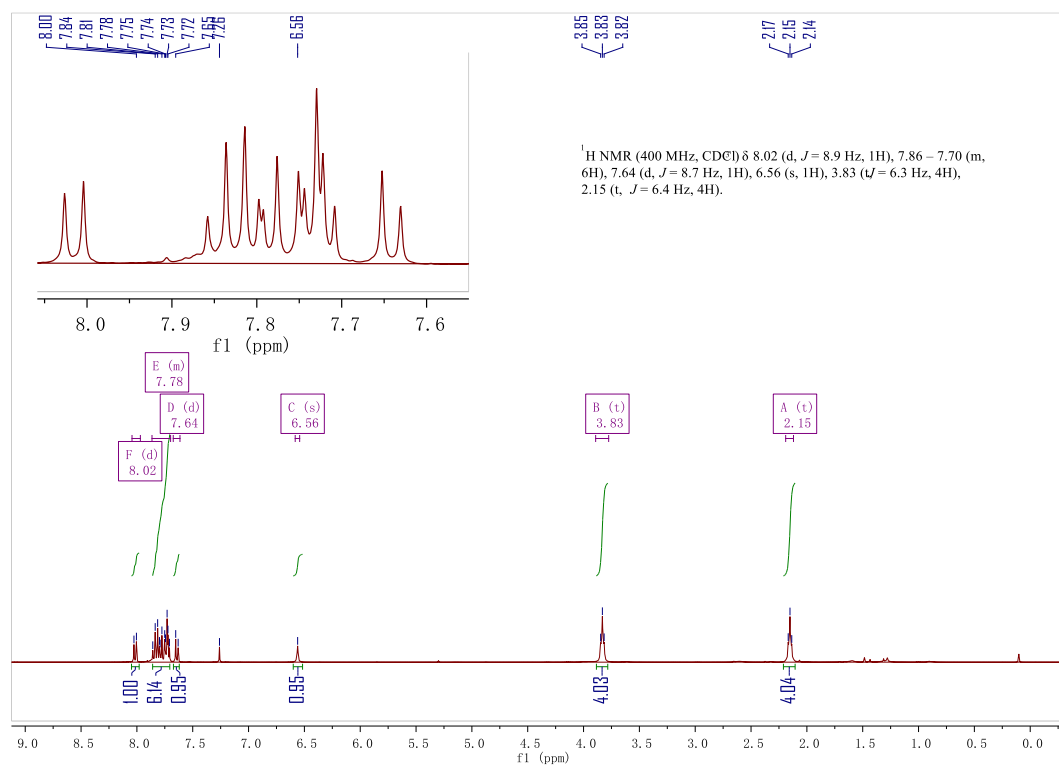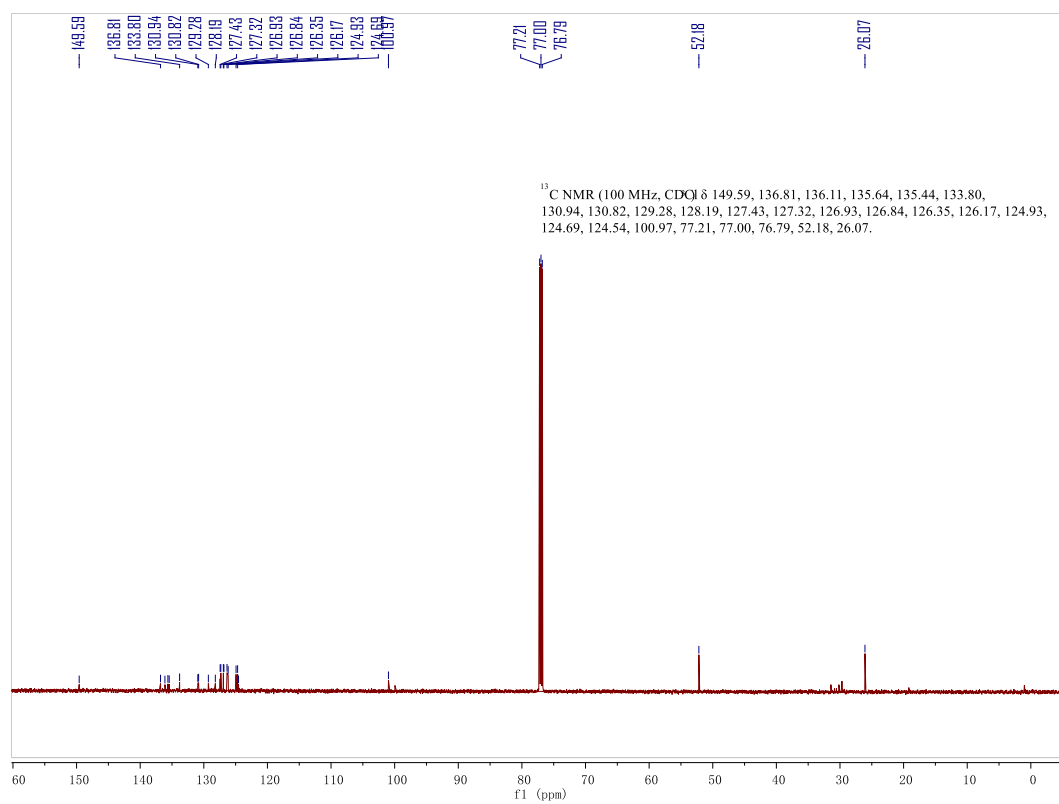

Compound **4g** (CDCl<sub>3</sub>):

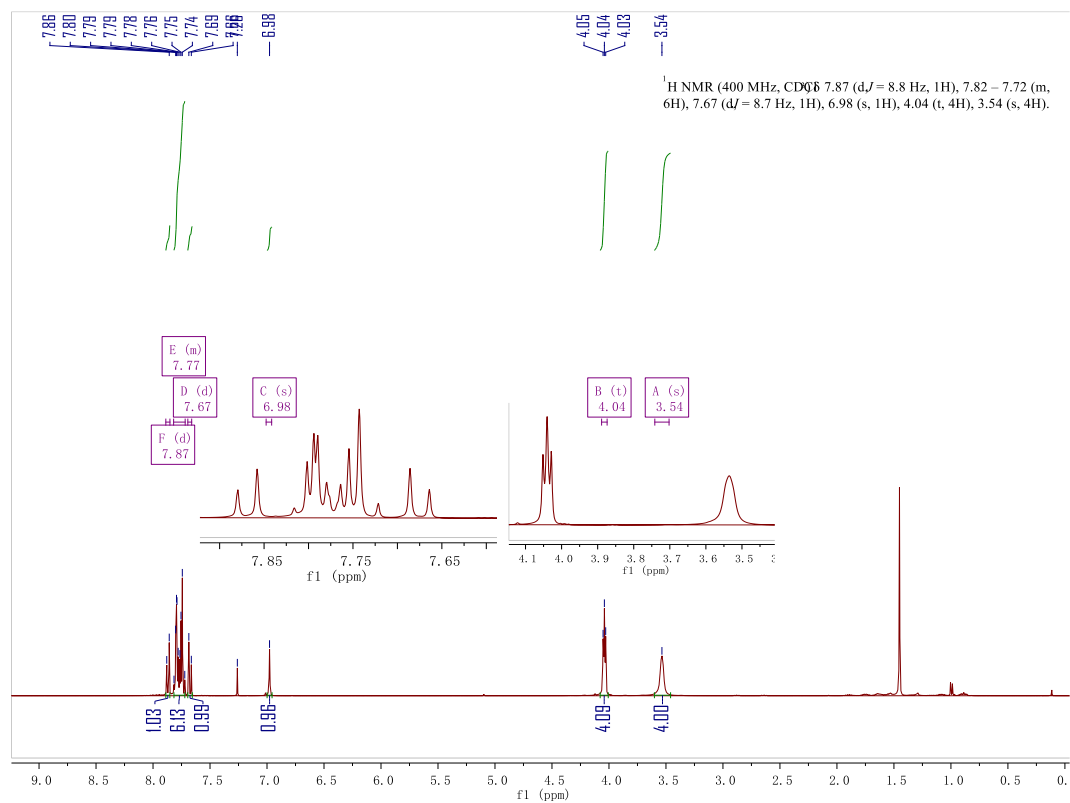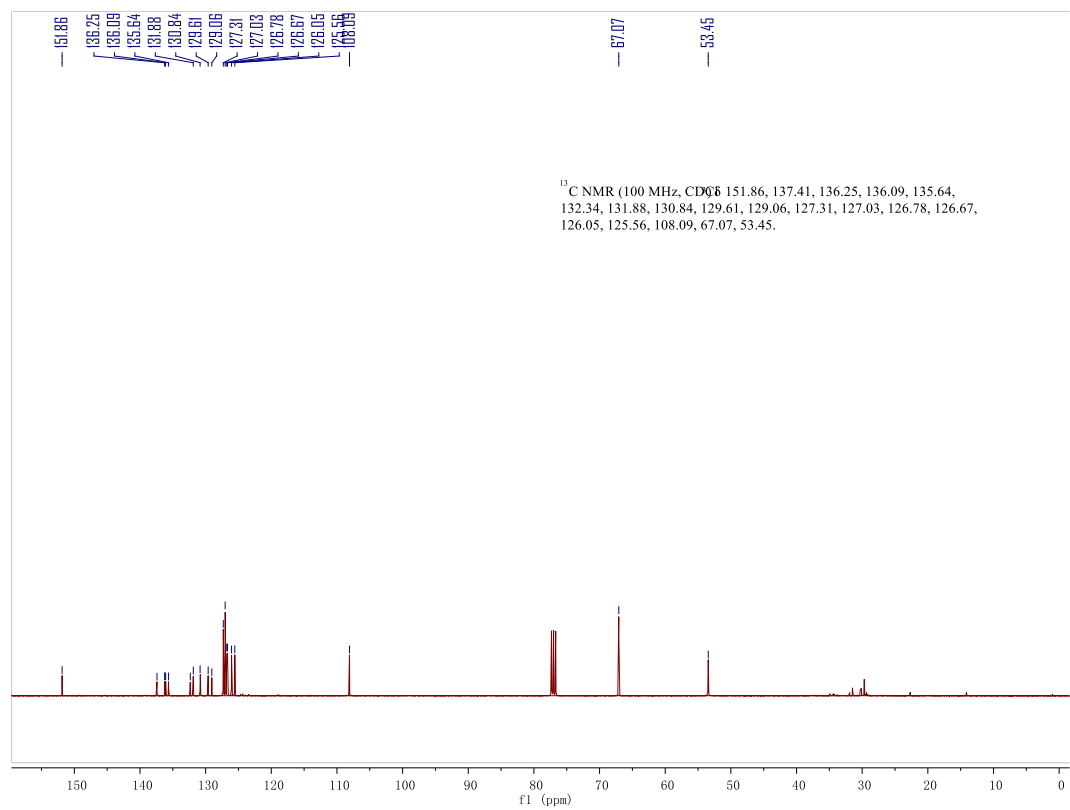

Compound **4h** (CDCl<sub>3</sub>):

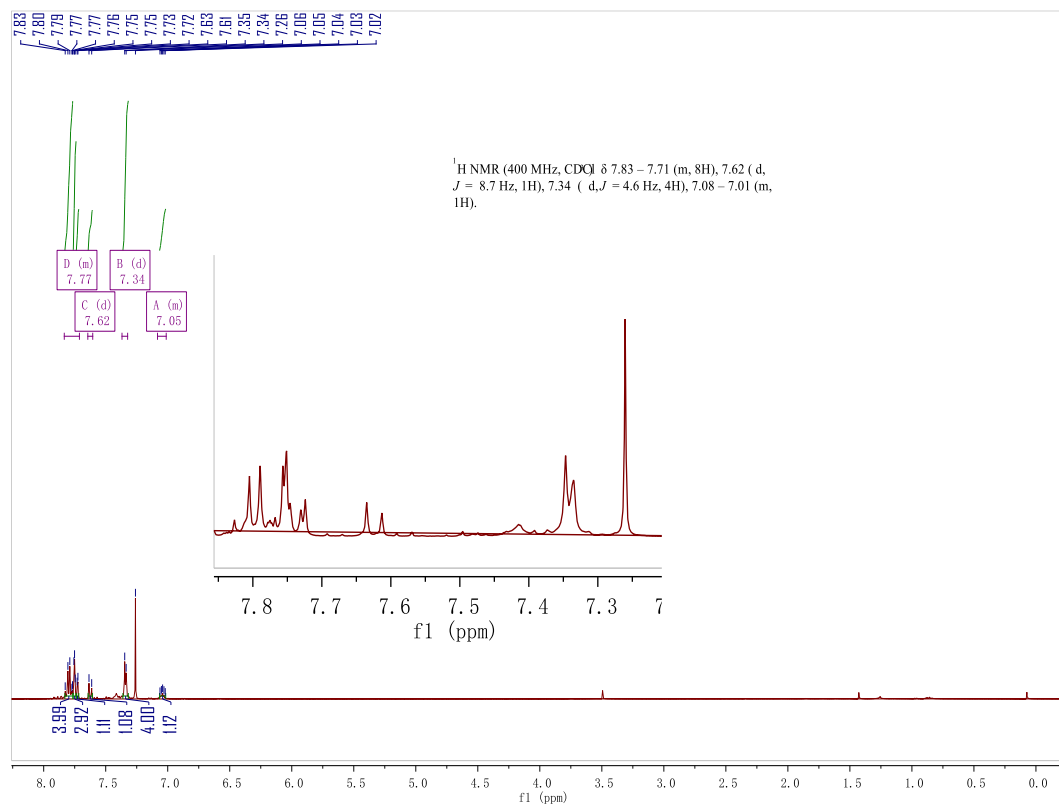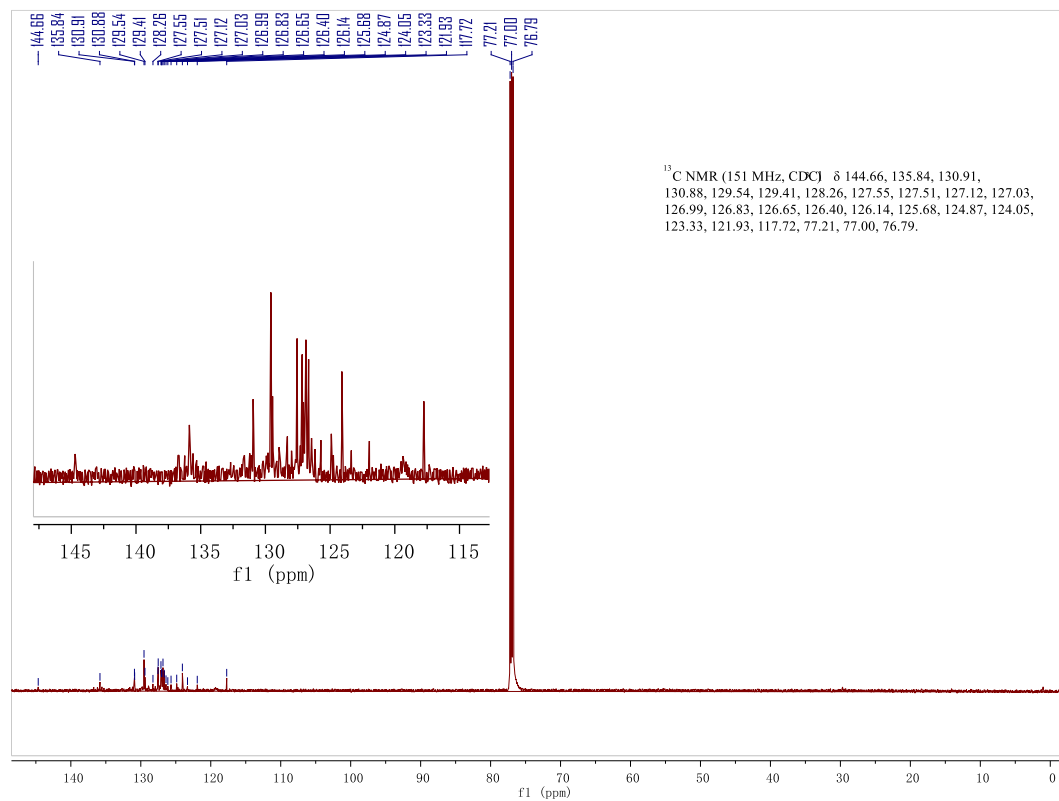

Compound **4i** (CDCl<sub>3</sub>):

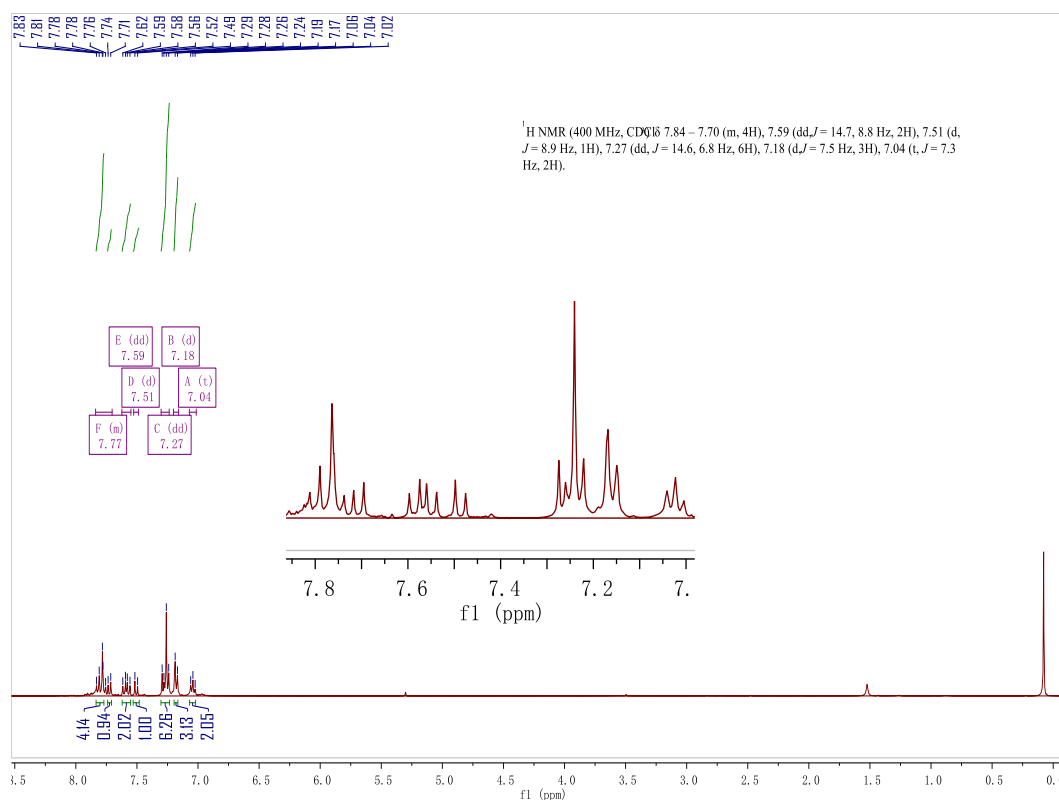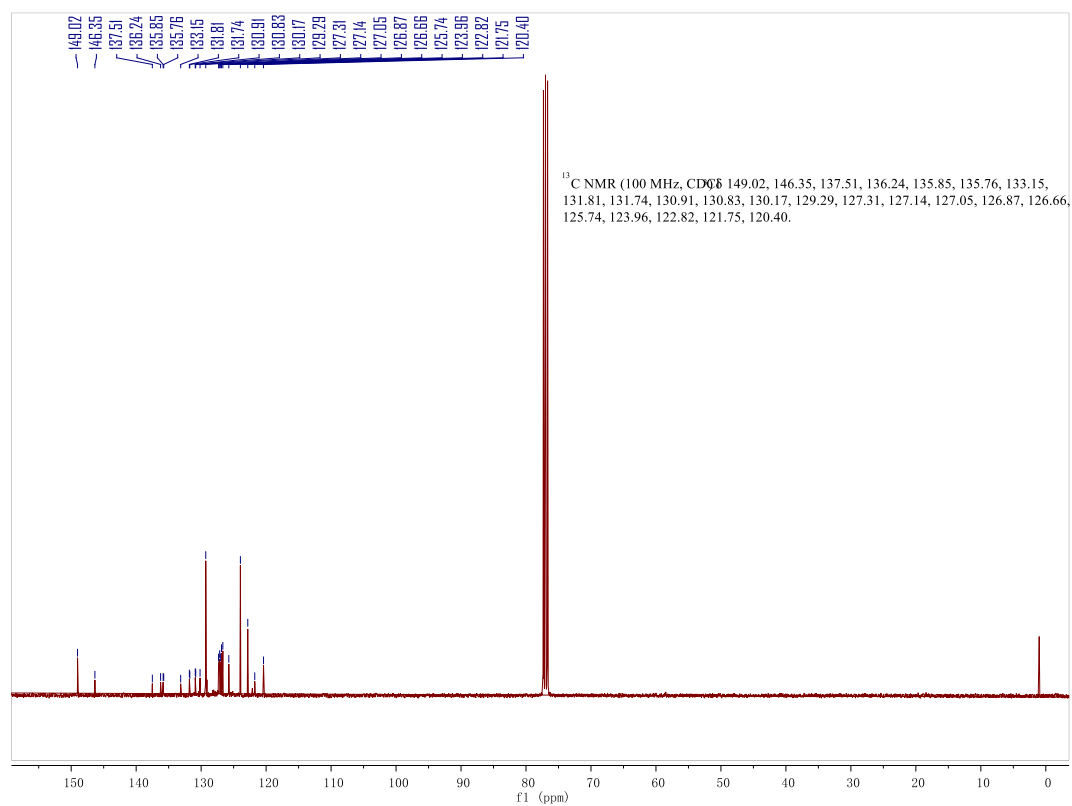

Compound **4j** (CD<sub>3</sub>OD):

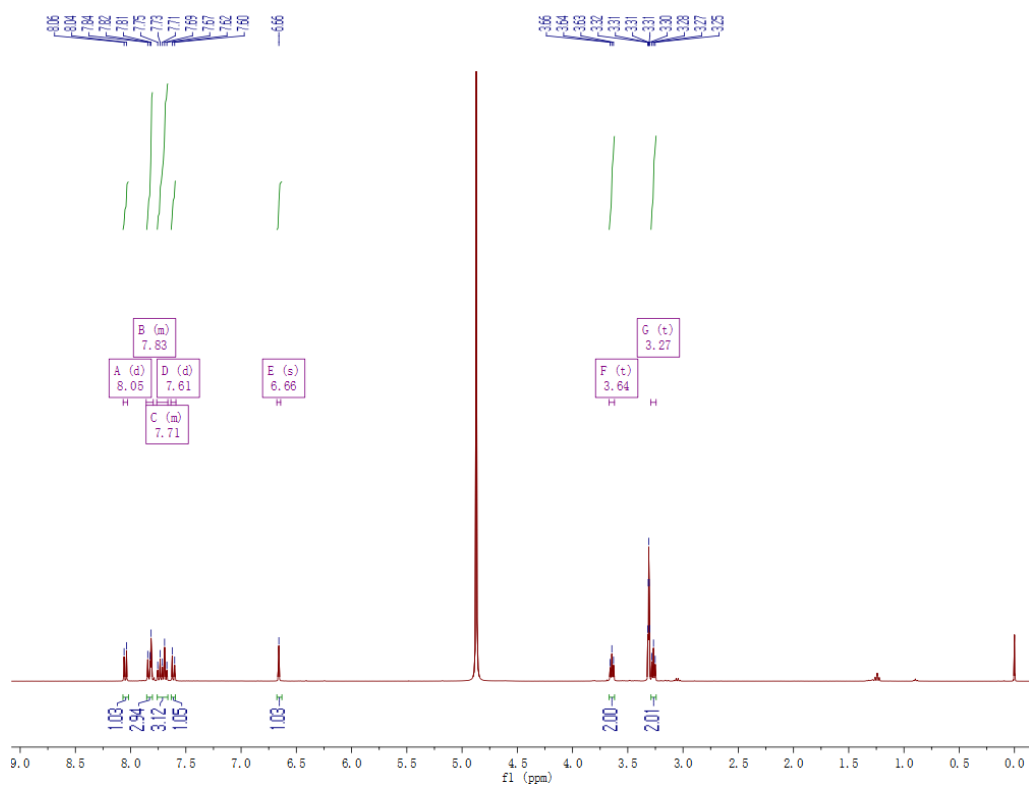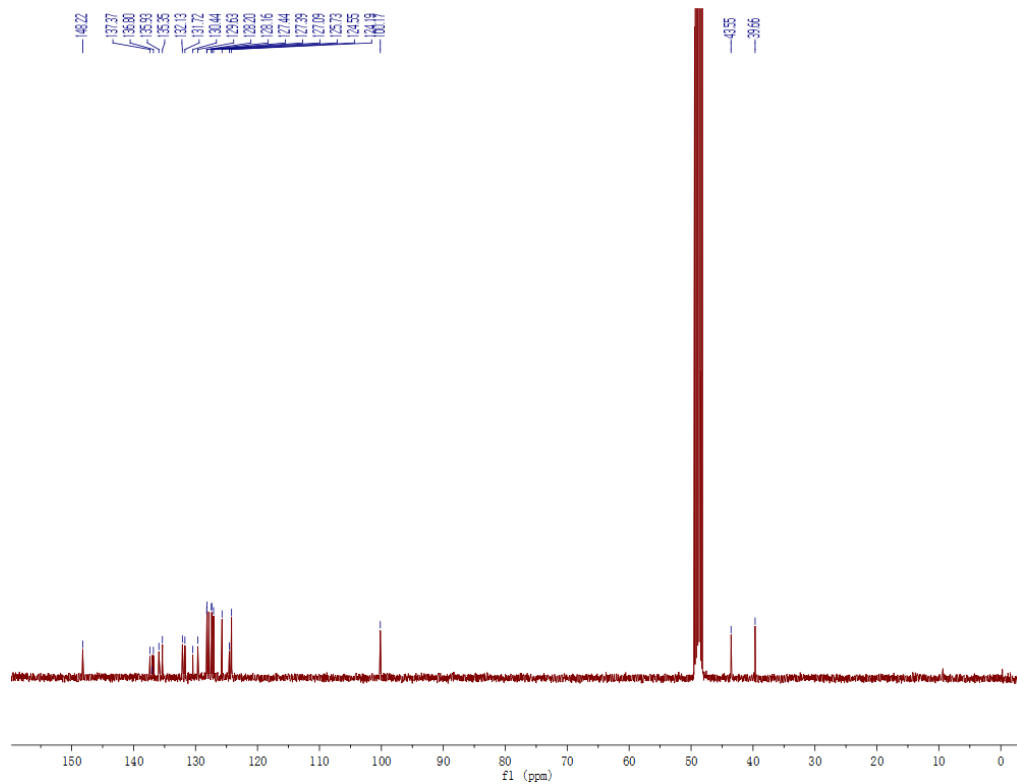



Compound **5a** (CDCl<sub>3</sub>):

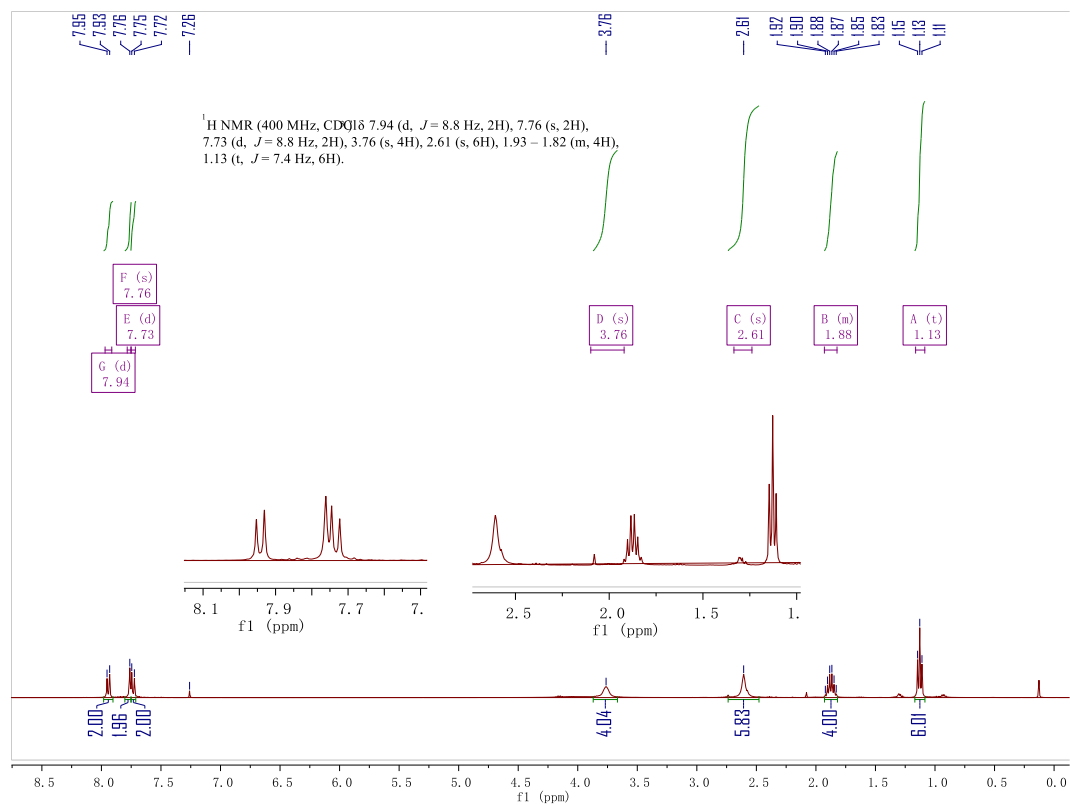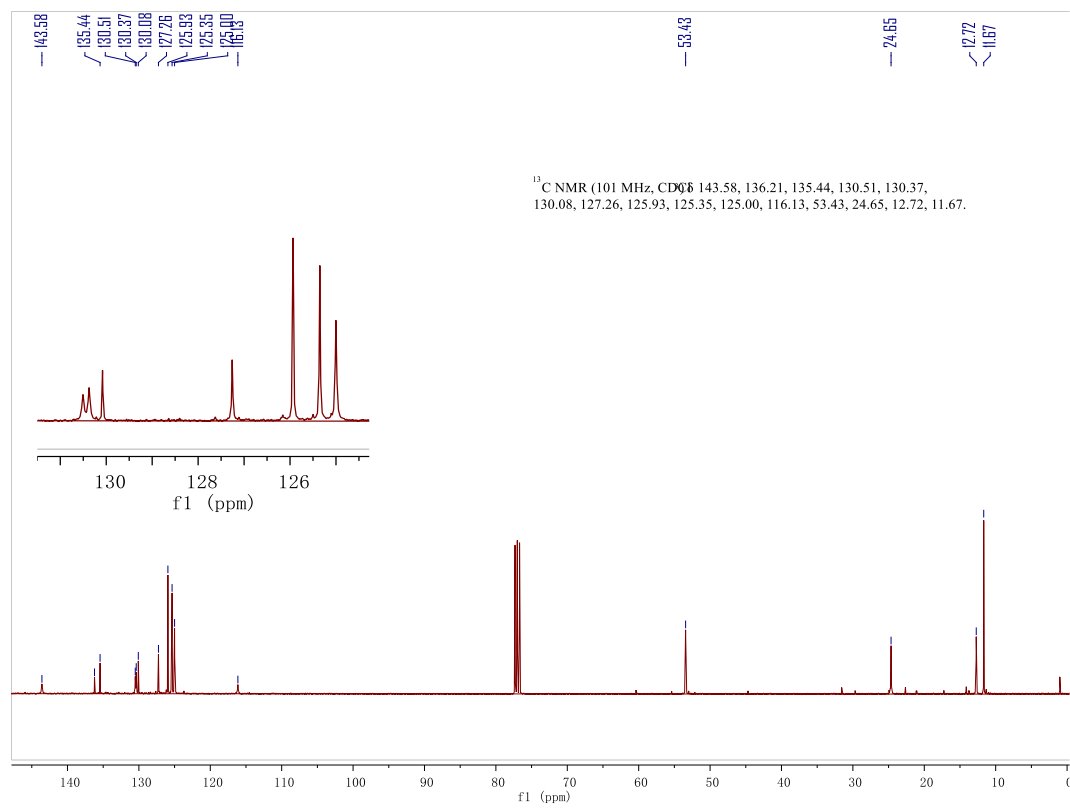

Compound **5b** (CDCl<sub>3</sub>):

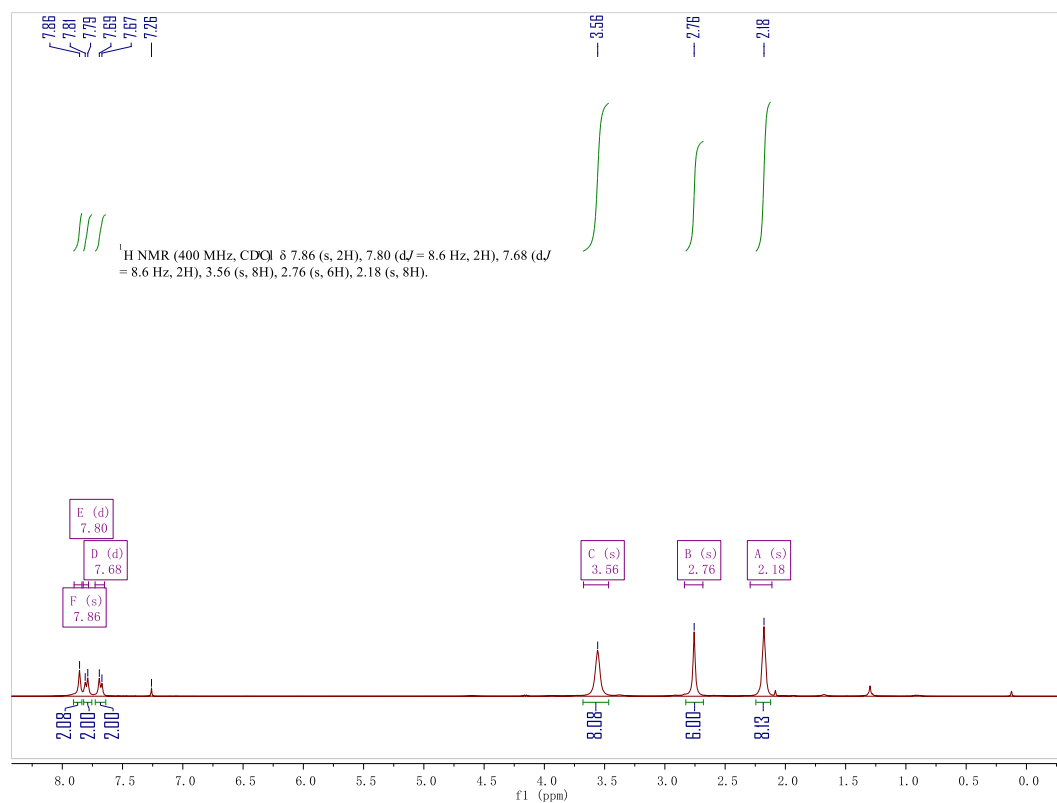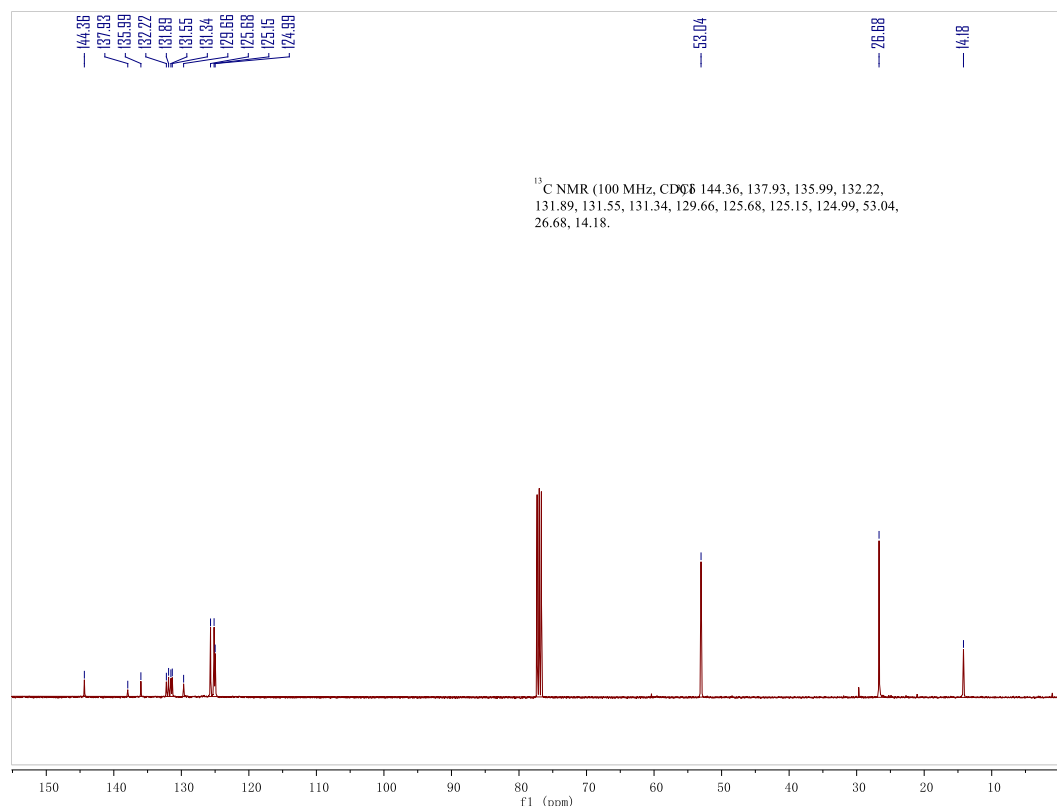

Compound **5c** (CDCl<sub>3</sub>):

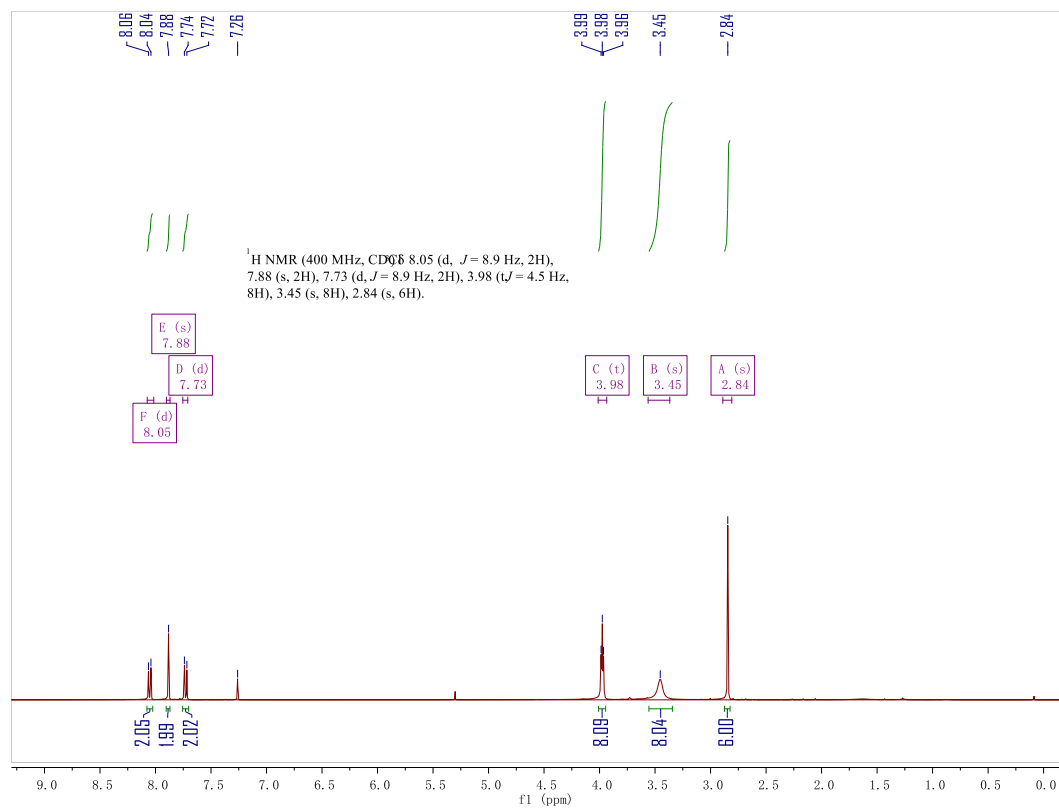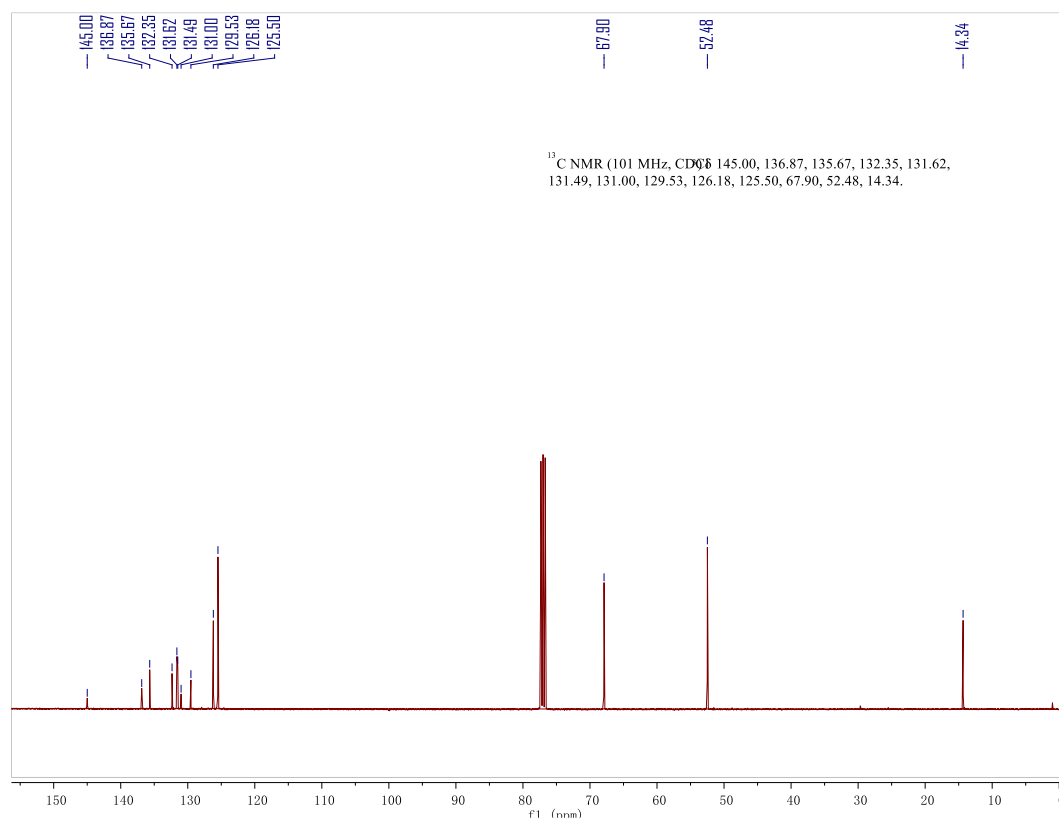

Compound **5d** (CDCl<sub>3</sub>):

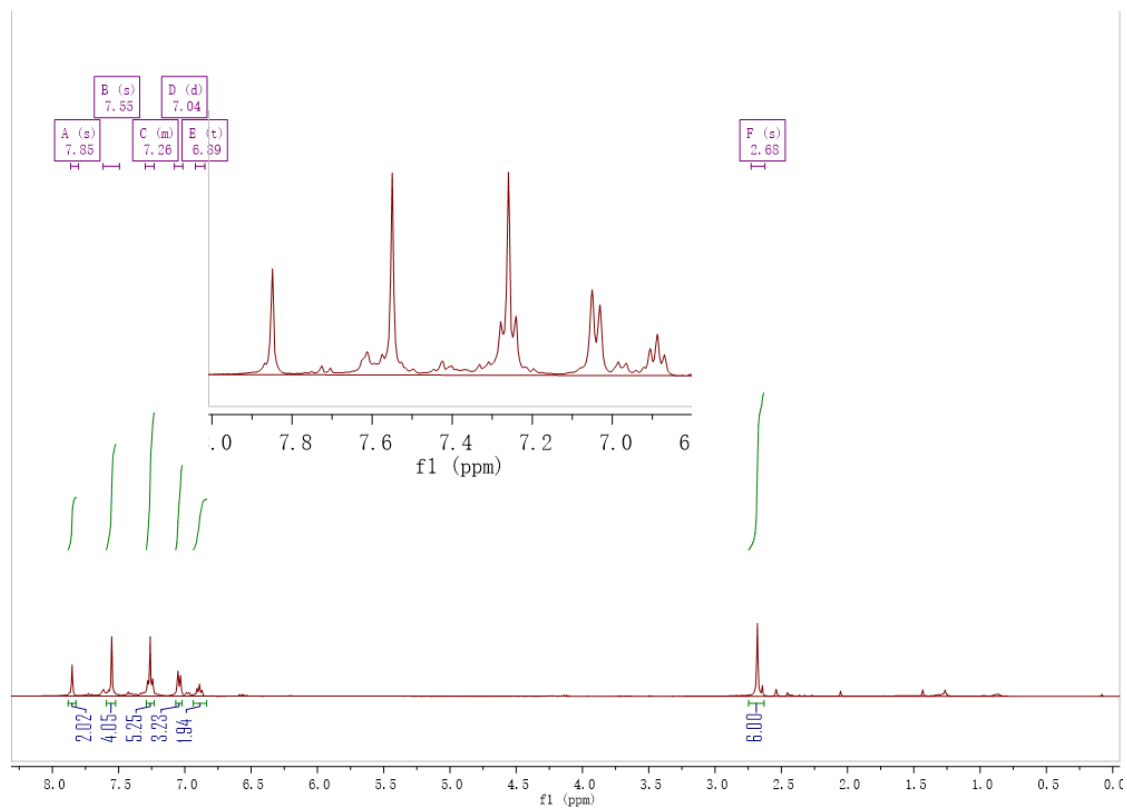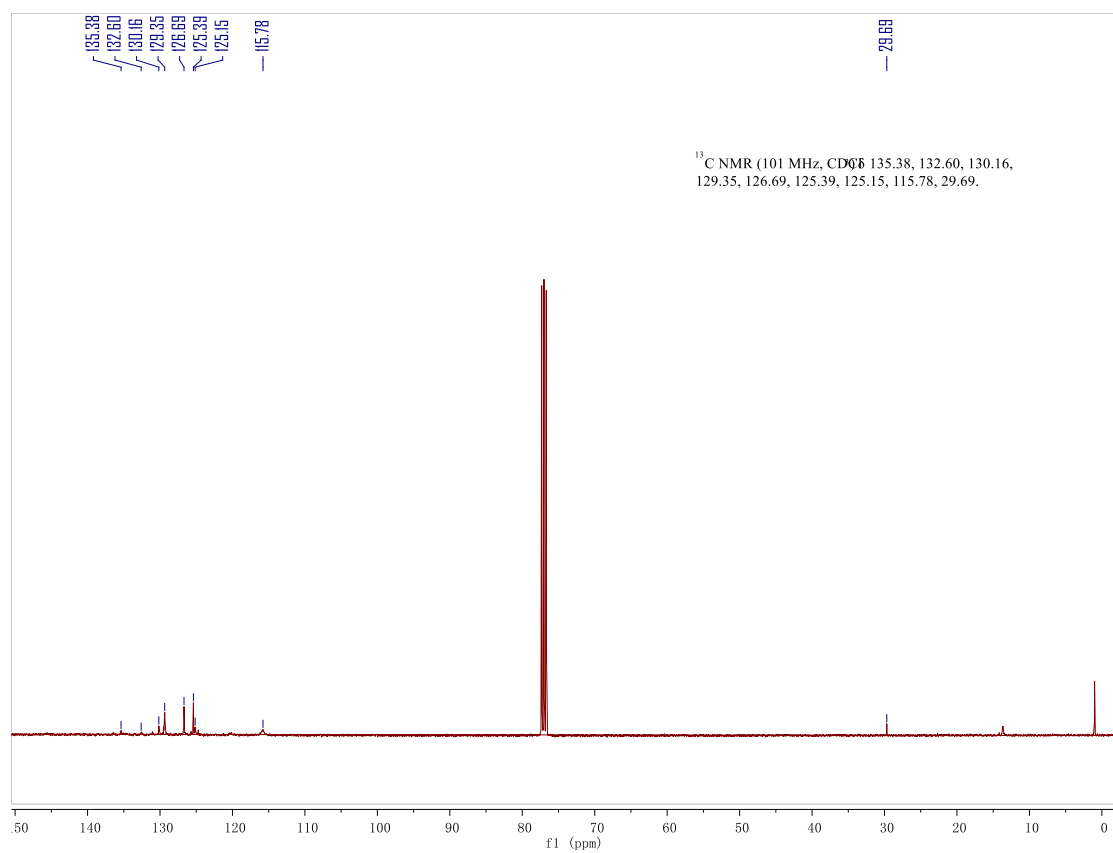

Compound **5e** ( $^1\text{H}$  NMR :  $\text{CD}_3\text{OD}$ ;  $^{13}\text{C}$  NMR :  $\text{DMSO-d}_6$ ):

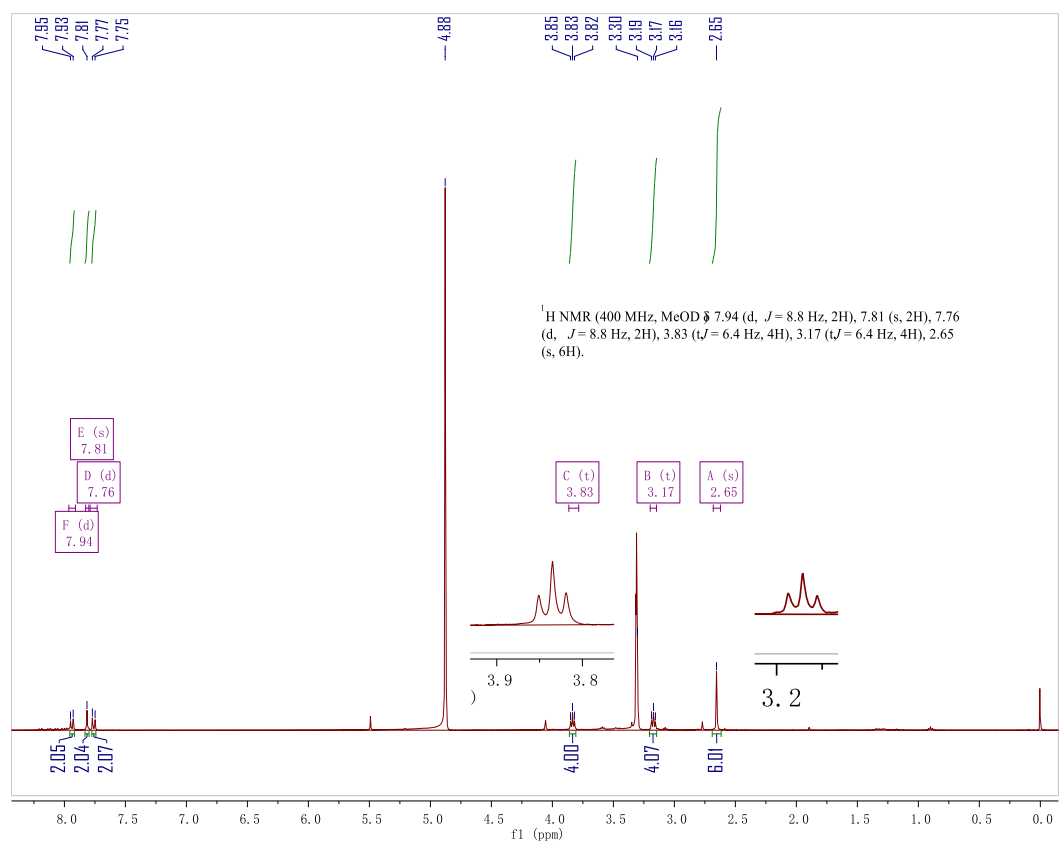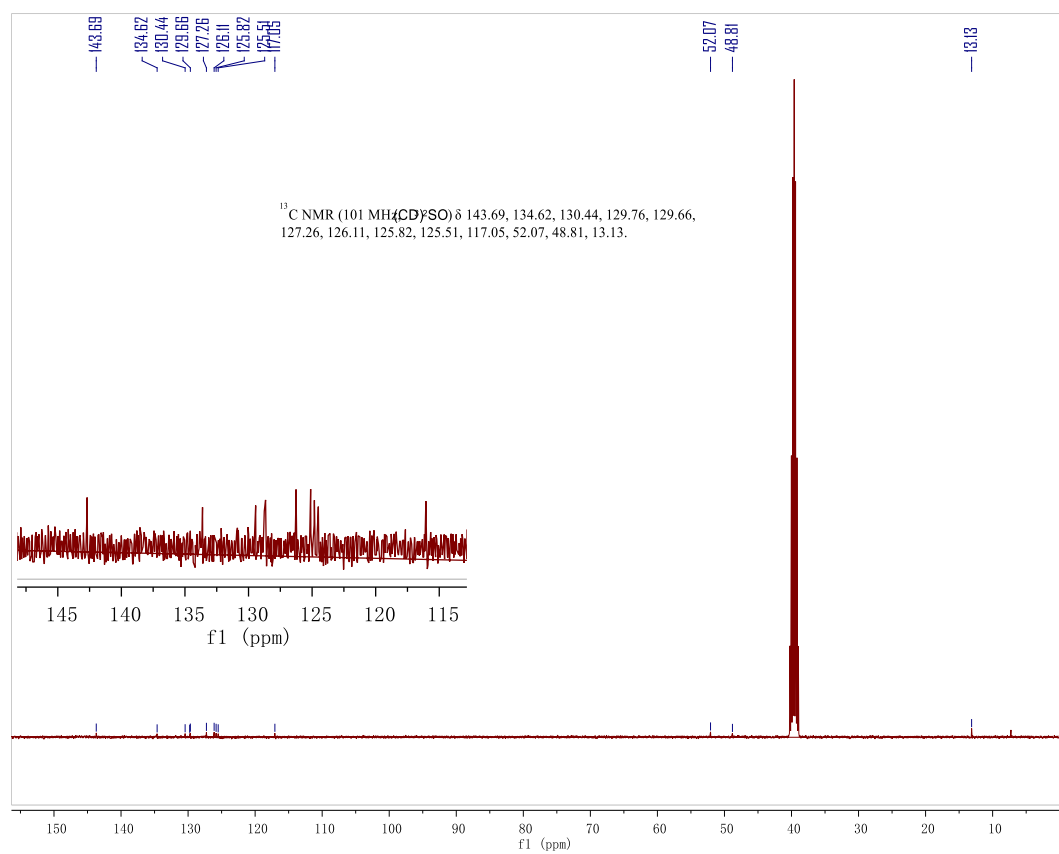

2,5-dimethylcorannulene (CDCl<sub>3</sub>):

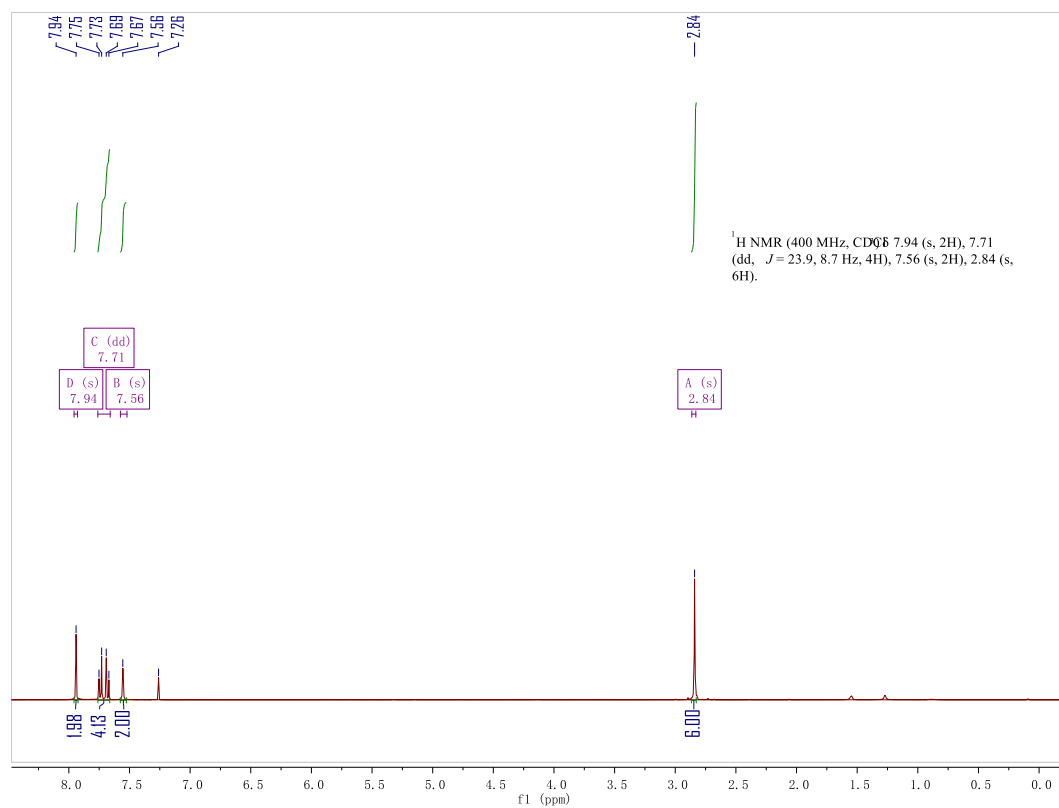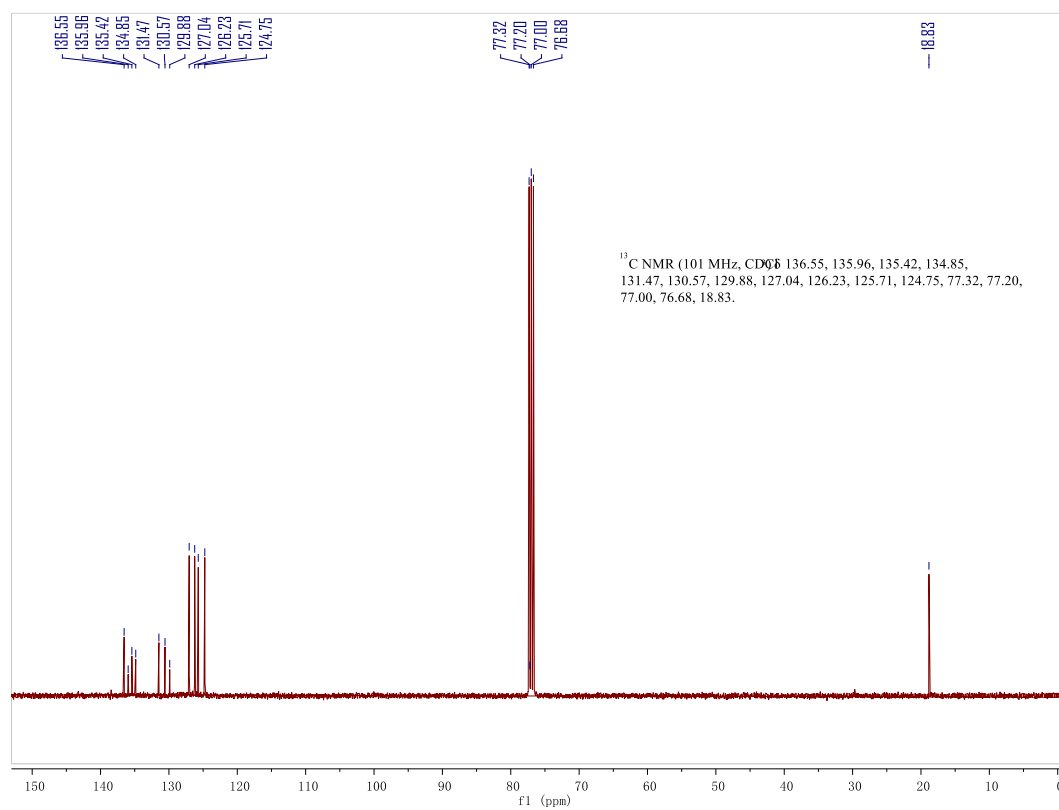

Supplement: d0cc03853a1.pdf [file d0cc03853a1.pdf]
